# Supplementary material
Source: PubMed Central journal article supplement (PMC8292979)
Supplement: MD-012-D1MD00117E-s001.pdf [file MD-012-D1MD00117E-s001.pdf]

*RSC Medicinal Chemistry*

## Supporting Information

### Discovery of potent nucleotide pyrophosphatase / phosphodiesterase3 (NPP3) inhibitors with ancillary carbonic anhydrase inhibition for cancer (immuno)therapy

Sang-Yong Lee,<sup>a,§</sup> Vigneshwaran Namasivayam,<sup>a,§</sup> Nader M. Boshta,<sup>a,b,§</sup> Arianna Perotti,<sup>a</sup> Salahuddin Mirza,<sup>a</sup> Silvia Bua,<sup>c</sup> Claudiu T. Supuran,<sup>c</sup> and Christa E. Müller<sup>\*,a</sup>

<sup>a</sup>*PharmaCenter Bonn, Pharmaceutical Institute, Department of Pharmaceutical & Medicinal Chemistry, University of Bonn, An der Immenburg 4, D-53121 Bonn, Germany*

<sup>b</sup>*Chemistry Department, Faculty of Science, Menoufia University, Gamal Abdel-Nasser Street, Shebin El-Kom 32511, Egypt*

<sup>c</sup>*Dipartimento Neurofarba, Sezione di Scienze Farmaceutiche e Nutraceutiche, Università degli Studi di Firenze, Via Ugo Schiff 7, 50019 Sesto Fiorentino, Florence, Italy.*

<sup>§</sup>equal contribution

#### \*Corresponding Author

Phone: +49 228 73 2301. Fax: +49 228 73 2567. E-mail: [christa.mueller@uni-bonn.de](mailto:christa.mueller@uni-bonn.de).

## **Table of Contents**

|                                                                                                                                                                         |         |
|-------------------------------------------------------------------------------------------------------------------------------------------------------------------------|---------|
| <b>Fig S1.</b> Comparison of binding pose of the ATP analog AMPCPP and <b>23</b> in the binding pocket of human NPP3 .....                                              | S3      |
| <b>Fig S2.</b> Sequence alignment of the human NPP subtypes NPP1, NPP2 and NPP3 .....                                                                                   | S4-S5   |
| <b>Table 1.</b> Inhibitory activities of 4-(phthalazin-1-yl)amino-benzenesulfonamide derivatives with modifications of the 4-substituent at NPP3, CA-II and CA-IX ..... | S6-S9   |
| <b>Table 2.</b> Inhibitory activities of differently substituted 4-(phthalazin-1-yl)aminobenzenesulfonamide derivatives at NPP3, CA-II and CA-IX .....                  | S10-S11 |
| <b>Fig. S3.</b> Summary of the structure-activity relationships of 4-(phthalazin-1-yl)aminobenzenesulfonamide derivatives as inhibitors of CA-II .....                  | S11     |
| <b>Fig. S4.</b> Summary of the structure-activity relationship studies of 4-(phthalazin-1-yl)aminobenzenesulfonamide derivatives as inhibitors of CA-IX .....           | S12     |
| <b>Fig. S5.</b> Concentration-inhibition curves of <b>1</b> , <b>23</b> , <b>31</b> and <b>34</b> with CA-II and CA-IX                                                  | S13     |
| <b>LCMS</b> data for the selected compounds.....                                                                                                                        | S14-S22 |
| <b>NMR</b> data for the selected compounds.....                                                                                                                         | S23-S37 |
| <b>References</b> .....                                                                                                                                                 | S38     |

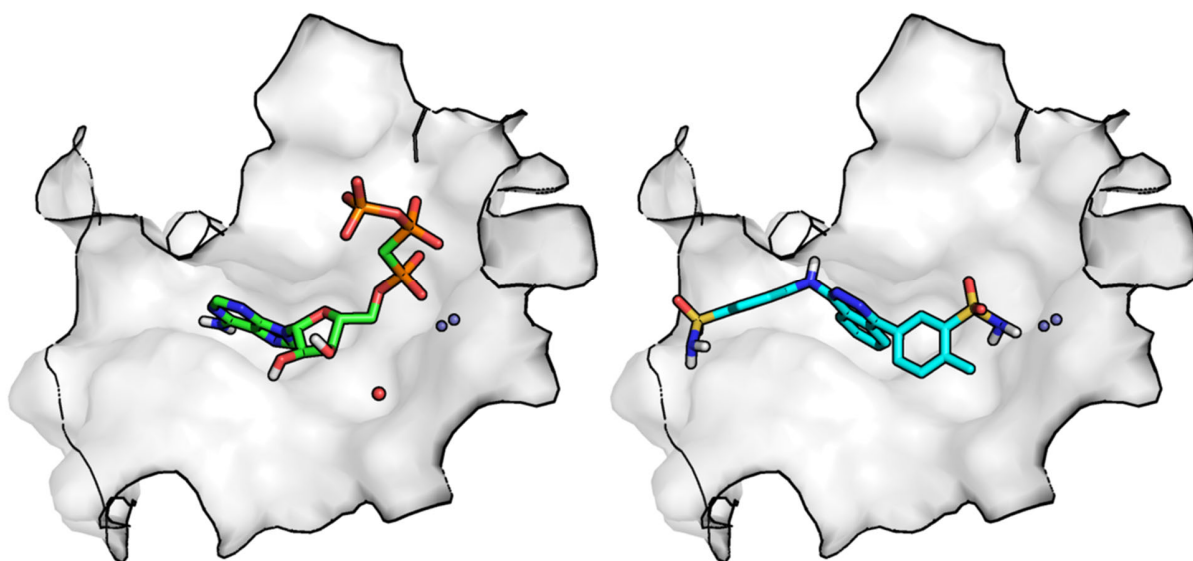

**Figure S1.** Comparison of binding pose of the ATP analog AMPCPP (carbon atoms colored green) and **23** (carbon atoms colored cyan) in the binding pocket of human NPP3. The two zinc ions in the substrate binding site are shown in orange. The water molecule involved in the interaction of AMPCPP and the two zinc ion is shown in red. The methyl group of the methylbenzenesulfonamide residue in compound **23** (right) is predicted to occupy the space where water molecule is located in the X-ray structure of the nucleotide-bound complex (left). The sulfonamido group likely forms strong interactions with the zinc ions.

SP|P22413|ENPP1\_HUMAN MERDGCAGGSRGGEGGRAPREGPAGNGRDRGRSHAAEAPGDPQAAAASLLAPMDV-GEEP 59  
 SP|Q13822|ENPP2\_HUMAN -----  
 SP|O14638|ENPP3\_HUMAN -----MESTLTLATEQP 12

SP|P22413|ENPP1\_HUMAN LEKAARARTAKDPNTYKVLSSLVLSVCLTITLGC-----FGLK-----PSCAK 103  
 SP|Q13822|ENPP2\_HUMAN -----MARRSSFQSCQIIISLFTFAVGVNICLGFTAHRIKRAEGWEEGPPTVLSDSPWTN 54  
 SP|O14638|ENPP3\_HUMAN VK-----KNTLKYYKIACIVLLALLVIMSLGLG-----LGLG-----LRKLE 49  
 . :. :. :. : : \*\* :

SP|P22413|ENPP1\_HUMAN EVKSCKGRCFERF---GNCRCDAAVELGNCCLDYQETCIEPEHIWTCNKFRGCEKRLT 160  
 SP|Q13822|ENPP2\_HUMAN ISGSCKGRCFELQEAGPPDCRCDNLCKSYTSCCHDFDELCLKTARGWECTKDRCGEVRNE 114  
 SP|O14638|ENPP3\_HUMAN KQGSCRKCKCFDASFRGLENCRCDVACKDRGDCWDFEDTCVESTRIWMCNKFRGCETRL 109  
 \*\*: \*\*: :\*\*\*\* \* . \*\* \*:: : : \* \* \* \* \*

SP|P22413|ENPP1\_HUMAN RSLCACSDDCCKDKGCCINYSVVCQGEKSWVEEPCEINEPQCPAGFETPPTLLFSLDGF 220  
 SP|Q13822|ENPP2\_HUMAN ENACHCEDCLARGDCCTNYQVVKGESHWVDDDCIEIKAAECPAGFVRPPLIIFSVDFG 174  
 SP|O14638|ENPP3\_HUMAN ASLCSGSDDCQLQRKDCADYKSVQGETSWLEENCDTAQQSQCPGFDLPPVILFSDMGF 169  
 . \* \* \* \* : \* \* : \* \* \* \* \* : : : \* \* \* \* \* : \* \* \* \* \*

SP|P22413|ENPP1\_HUMAN RAEYLHTWGGLLPVIKLLKCGTYTKNMRVYPTKTFPNHYSIVTGLYPESHGIIDNKMY 280  
 SP|Q13822|ENPP2\_HUMAN RASYMKKGSKVMPNIEKLRSCGTHSPYMRVYPTKTFPNLYTLATGLYPESHGIVGNSMY 234  
 SP|O14638|ENPP3\_HUMAN RAEYLHTWGGLLPVIKLLKCGTYTKNMRVYPTKTFPNHYSIVTGLYPESHGIIDNKMY 229  
 \* . \* : . . : \* \* \* \* \* : : \* \* : \* \* \* \* \* \* : : \* \* \* \* \* \* : \* \* \*

SP|P22413|ENPP1\_HUMAN DPKMNASFSLKSKEKFNPEWYKGEPIWVTAKYQGLKSGTFFWPGSDVEINGIFPDIYKMY 340  
 SP|Q13822|ENPP2\_HUMAN DPVFDATFHLRGREKFNHRWGGQPLWITATKQGVKAGTFWFSV----- 278  
 SP|O14638|ENPP3\_HUMAN DVNLNKNFSLSSKEONNPAWVHGHQPMWLTAMYQGLKAATYFWPGSEVAINGSFPSIYMPY 289  
 \* : : \* \* . : \* : \* : \* \* \* \* \* \* \* \* \* \* \* : \* \*

SP|P22413|ENPP1\_HUMAN NGSVPFEERILAVLQWLQLPKDERPHFYTLYLEEPDSSGHSYGPVSSEVIKALQRVDGMV 400  
 SP|Q13822|ENPP2\_HUMAN --VIPHERILITLQWLTLDPHERPSVYAFYSEQPDFSGHKYGFPGPEMTNPLREIDKIV 336  
 SP|O14638|ENPP3\_HUMAN NGSVPFEERISTLLKWLDPKAERPRFYTMYLEEPDSSGHAGGPVSARVIKALQVVDHAF 349  
 : \* . \* \* \* : : \* \* \* \* \* \* \* \* \* \* \* \* \* \* \* \* \* \* : : \* : \*

SP|P22413|ENPP1\_HUMAN GMLMDGLKELNLHRCNLNLLISDHGMEQGSCKYIYLNKYLGDVKNIKVIYGAARLRPS 460  
 SP|Q13822|ENPP2\_HUMAN GQLMDGLKQLKLRHRCVNIIFVGDHGMEDVTCDRTEFLSNYLTNVDDITLVPGLGRIRSK 396  
 SP|O14638|ENPP3\_HUMAN GMLMEGLKQRNLHNCVNIILLADHGMDDQTYCNKMEYMTDYFPRINFFYMEGAPRIRAH 409  
 \* \* \* \* \* : \* \* \* \* \* : \* \* \* \* \* : \* : : : \* : : \* \* \*

SP|P22413|ENPP1\_HUMAN DVPDKYYSFNIEGIARNLSCREPNQHFHPYKHLKFLPKRLHFAKSDRIEPLTFYLDPOWQL 520  
 SP|Q13822|ENPP2\_HUMAN FSNN--AKYDPKAI IANLTCKKPDQHFHPYKHLKFLPKRLHYANNRRIEDIHLLVERRHWV 454  
 SP|O14638|ENPP3\_HUMAN NIPHDFFSFNSEIIVRNLSCRKPDQHFHPYKHLKFLPKRLHYAKNVRIDKVHLFVDQWLA 469  
 . : : : \* \* \* \* \* : \* \* \* \* \* \* \* \* \* \* \* \* \* \* \* \* \* : : : \*

SP|P22413|ENPP1\_HUMAN ALNPSE-----RKYCGSGFHGSDNVFSNMQALFVGYGPGFKHGIEADTFENIEVYNLMC 574  
 SP|Q13822|ENPP2\_HUMAN ARKPLDVYKPKSGKCFQGDHGFNDKNVNSMQTVFVGYGSTFKYKTKVPPFENIELYNVMC 514  
 SP|O14638|ENPP3\_HUMAN V-RSKS-----NTNCGGNGHGYNNEFRSMEAIFLAHGPSFKEKTEVEPFENIEVYNLMC 522  
 . . . . \* \* \* \* \* : \* \* \* \* \* : . \* \* \* \* \* \* \* \*

SP|P22413|ENPP1\_HUMAN DLLNLTAPANNTHGSLNHLKPNVYTPKHPKEVHPLVQCPFTRN-PRDNLGCSCNPSI- 632  
 SP|Q13822|ENPP2\_HUMAN DLLGLKAPANNTHGSLNHLRNTFRPTMPEEVTRPNYPGIMYLSQDFDLGCTCDDKVE 574  
 SP|O14638|ENPP3\_HUMAN DLLRIQAPANNTHGSLNHLKVPFYEPHAEVSKFVSCGFANPLPTESLDCFCPHLQN 582  
 \* \* \* : \* \* \* \* \* \* \* \* \* : \* : \* \* : : \* \* \*

SP|P22413|ENPP1\_HUMAN -L-PIEDFQTQFNLTVAEEKIKHETLPHYGRPRVLQKENTICLLSQHFMSGYSQDILMP 690  
 SP|Q13822|ENPP2\_HUMAN PKNKLE----LNKRLHTKGS TEERHLLYGRPAVLYRTR-YDILYHTDFESGYSEIFLMP 629  
 SP|O14638|ENPP3\_HUMAN ST-QLEQVNQMLNLTQEEITATVKVNLFPGRPRVLQKNVDHCLLYHREYVSGFGKAMRMP 641  
 : : : : \* . \* \* \* \* \* : : \* : : : \* \* : : \*

SP|P22413|ENPP1\_HUMAN LWTSYTVDRNDSF--STEDFSNCLYQDFRIPSPVHKCSFYKNNTKVSYGFLSPPQLNKN 748  
 SP|Q13822|ENPP2\_HUMAN LWTSYTVSKQAEVSSVPDHLTSCVRPDRVSPSFSQNCCLAYKNDKQMSYGFLLPPYLSSS 689  
 SP|O14638|ENPP3\_HUMAN MWSSYTVPQLGDTSPLPPTVPDCLRADVRVPPSESQKCSFYLDKNITGHFLYPPASNRT 701  
 : \* \* \* \* : . . \* : \* \* : \* : \* \* \* \* \* \* \* \* \* \*



```

SP|P22413|ENPP1_HUMAN SSGIYSEALLTNIIVPMYQSFQVIWRYFHDTLLRKYAEERNGVNVVSGPVDFDFDYDGRCD 808
SP|Q13822|ENPP2_HUMAN PEAKY-DAFLVTNMVPMYPAPFKRVWNYFQRVLVKKYASERNGVNVI SGPIFDYDYGDLHD 748
SP|O14638|ENPP3_HUMAN SDSQY-DALITSNLVPMYEEFRKMWDYFHSVLLIKHATERNGVNVVSGPIFDYNYDGHFD 760
.. * :*:.:.*:*:*:* * : :* ** : .* : * * *****.***:***:*** *

SP|P22413|ENPP1_HUMAN SLENLRQKRRVIRNQEILIPTHFFIVLTSCCKDTSQTPLHCEN-LDTLAFILPHRTDNSES 867
SP|Q13822|ENPP2_HUMAN TEDKIK---QYVEGSSIPVPTHYYSIITSCLDFTQPADKCDGPLSVSSFILPHRPDNEES 805
SP|O14638|ENPP3_HUMAN APDEIT---KHLANTDVPIPTHYFVVLTSCKNKSHTPENC PGWLDVLPFIIPHRPTNVES 817
: ::: : : . .: :***:: :** * : : : * . *.. **:*** * **

SP|P22413|ENPP1_HUMAN CVHGKHSSWVEELMLHRARITDVEHITGLSFYQQRKEPVSDILKCLKTHLPTFSQED 925
SP|Q13822|ENPP2_HUMAN CNSSEDESKWVEELMKMHTARVRDIEHLTSLDFFRKT SRSYPEILTLKTYLHTYESEI 863
SP|O14638|ENPP3_HUMAN CPEGKPEALWVEERFTAHIARVRDVELLTGLDFYQDKVQPVSEILQLKTYLPTFETTI 875
* .: : : **** : * ** : * : * . * . * : . . : ** ** : * * : .

```

**Figure S2.** Sequence alignment of the human NPP subtypes NPP1, NPP2 and NPP3. For each sequence, the Uniprot accession number, the subtype and the organism name are given. Important amino acid residues in the binding pocket are highlighted in yellow.

**Table 1.** Inhibitory activities of 4-(phthalazin-1-yl)aminobenzenesulfonamide derivatives with modification of the 4-substituent at human NPP3, CA-II and CA-IX

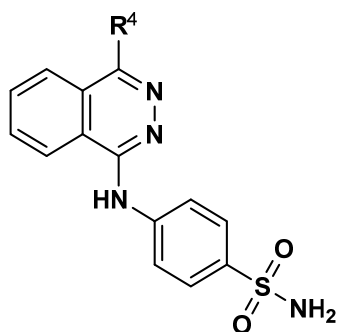

| Compd. | R <sup>4</sup>               | K <sub>i</sub> ± SEM (nM) |                                     |                                    |
|--------|------------------------------|---------------------------|-------------------------------------|------------------------------------|
|        |                              | NPP3                      | CA-II                               | CA-IX                              |
| II     | Reactive blue 2 <sup>1</sup> | 710 ± 30                  | n.d.                                | n.d.                               |
| 1      | ---CH <sub>3</sub>           | 1110 ± 40                 | 948 ± 62                            | 1060 ± 78                          |
| 16     |                              | 10300 ± 1200              | 208 ± 16<br>(>10000) <sup>a</sup>   | 932 ± 54<br>(>10000) <sup>a</sup>  |
| 17     |                              | 5320 ± 120                | 155 ± 9                             | 286 ± 25                           |
| 6a     |                              | 20100 ± 2400              | 2080 ± 128<br>(>10000) <sup>a</sup> | 1170 ± 84<br>(>10000) <sup>a</sup> |
| 6b     |                              | 5090 ± 240                | n.d.                                | n.d.                               |
| 18     |                              | 20300 ± 300               | n.d.                                | n.d.                               |

|    |                                                                                     |                  |                                    |                              |
|----|-------------------------------------------------------------------------------------|------------------|------------------------------------|------------------------------|
| 19 | 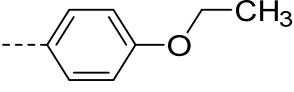   | $24700 \pm 1500$ | $285 \pm 17$                       | $19.5 \pm 0.70$              |
| 20 |    | $30600 \pm 1000$ | $291 \pm 21$                       | $22.4 \pm 1.30$              |
| 21 |    | $25900 \pm 800$  | $173 \pm 9.6$                      | $143 \pm 7.8$                |
| 22 |    | $25700 \pm 1400$ | $2840 \pm 157$                     | $1990 \pm 155$               |
| 23 |   | $53.7 \pm 3.1$   | $74.7 \pm 6.1$<br>$(547 \pm 25)^a$ | $20.3 \pm 1.6$<br>$(0.48)^a$ |
| 6c |  | $2120 \pm 130$   | $> 10000$<br>$(455 \pm 3)^a$       | $1470 \pm 115$<br>$(18.5)^a$ |
| 6d |  | $3340 \pm 650$   | n.d.                               | n.d.                         |
| 6e |  | $15600 \pm 2800$ | n.d.                               | n.d.                         |

|    |                                                                                     |                  |                |                 |
|----|-------------------------------------------------------------------------------------|------------------|----------------|-----------------|
| 6f | 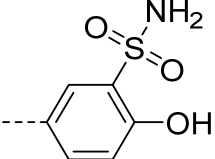   | $25400 \pm 3800$ | n.d.           | n.d.            |
| 24 |    | $4090 \pm 140$   | $72.7 \pm 5.9$ | $15.0 \pm 0.97$ |
| 25 |    | $30200 \pm 700$  | $204 \pm 9$    | $19.5 \pm 1.3$  |
| 26 |   | $30100 \pm 1600$ | $846 \pm 49$   | $26.2 \pm 1.4$  |
| 27 |  | $25400 \pm 1900$ | $139 \pm 11$   | $13.7 \pm 0.65$ |
| 28 |  | $23700 \pm 700$  | $72.1 \pm 4.6$ | $1120 \pm 70$   |

|    |                                                                                     |                  |                |                 |
|----|-------------------------------------------------------------------------------------|------------------|----------------|-----------------|
| 29 | 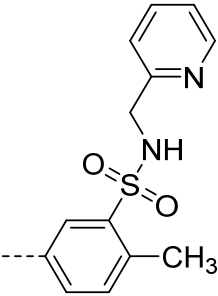   | $5570 \pm 450$   | $852 \pm 49$   | $18.9 \pm 0.75$ |
| 30 |    | $8880 \pm 120$   | $1730 \pm 126$ | $26.3 \pm 0.9$  |
| 31 |   | $50700 \pm 1200$ | > 10000        | $30.7 \pm 2.8$  |
| 32 |  | $49800 \pm 1100$ | $941 \pm 81$   | $27.1 \pm 2.0$  |
| 33 |  | $45200 \pm 1900$ | $3700 \pm 340$ | $143 \pm 10$    |

<sup>a</sup>  $IC_{50}$  values from literature<sup>2</sup>  
n.d. = not determined

**Table 2.** Inhibitory activities of differently substituted 4-(phthalazin-1-yl)aminobenzenesulfonamide derivatives at human NPP3, CA-II and CA-IX

| Compd.    | R <sup>1</sup>                                                                      | R <sup>2</sup>    | K <sub>i</sub> ± SEM (nM) |            |             |
|-----------|-------------------------------------------------------------------------------------|-------------------|---------------------------|------------|-------------|
|           |                                                                                     |                   | NPP3                      | CA-II      | CA-IX       |
|           | 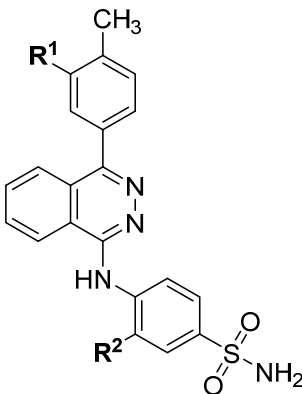   |                   |                           |            |             |
|           |                                                                                     |                   | <b>6g, 11, and 15</b>     |            |             |
|           |    |                   |                           |            |             |
|           |                                                                                     |                   | <b>34-36</b>              |            |             |
|           |  |                   |                           |            |             |
|           |                                                                                     |                   | <b>37-40</b>              |            |             |
| <b>6g</b> |  | --CH <sub>3</sub> | 29900 ± 3400              | 4260 ± 349 | 2500 ± 137  |
| <b>11</b> |  | --H               | 74200 ± 6800              | > 10000    | > 10000     |
| <b>15</b> |  | --H               | 80700 ± 9900              | > 10000    | > 10000     |
| <b>34</b> |  |                   | 20100 ± 800               | 73.7 ± 6.0 | 19.7 ± 1.0  |
| <b>35</b> |  |                   | 19700 ± 1100              | n.d.       | n.d.        |
| <b>36</b> |  |                   | 30900 ± 1400              | 474 ± 38   | 24.5 ± 1.40 |

|    |                   |              |      |      |
|----|-------------------|--------------|------|------|
| 37 | --CH <sub>3</sub> | 60700 ± 3500 | n.d. | n.d. |
| 38 | --Cl              | 40200 ± 2100 | n.d. | n.d. |
| 39 | ---F              | 50900 ± 3400 | n.d. | n.d. |
| 40 | --OH              | 35100 ± 1200 | n.d. | n.d. |

n.d. = not determined

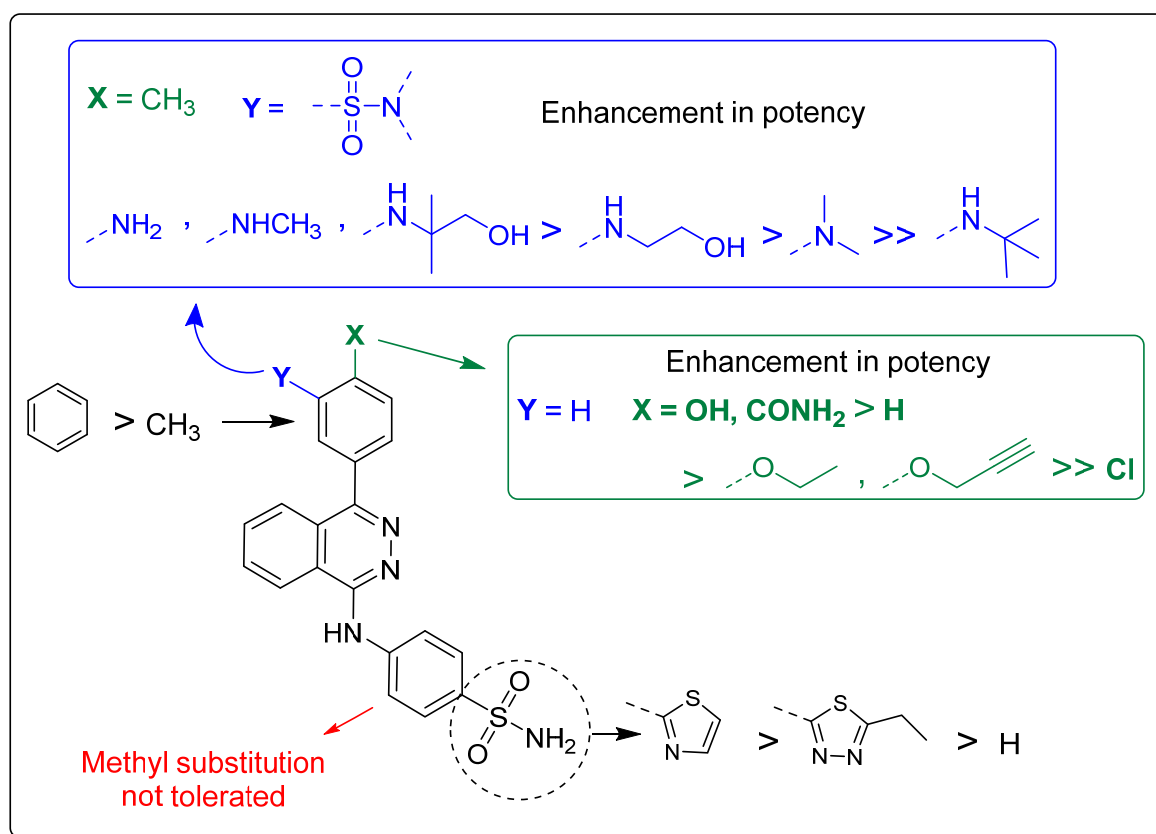

**Fig. S3.** Summary of the structure-activity relationships of 4-(phthalazin-1-yl)amino-benzenesulfonamide derivatives as inhibitors of CA-II.

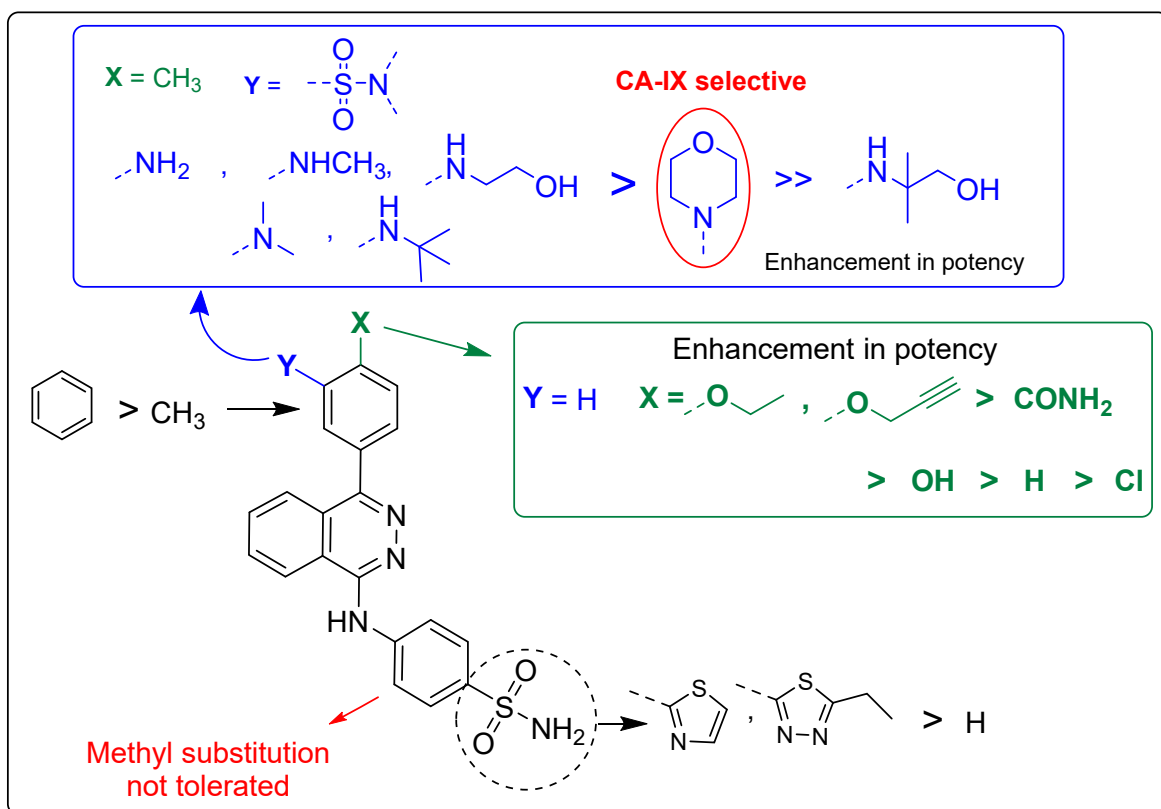

**Fig. S4.** Summary of the structure-activity relationships of 4-(phthalazin-1-yl)amino-benzenesulfonamide derivatives as inhibitors of CA-IX.



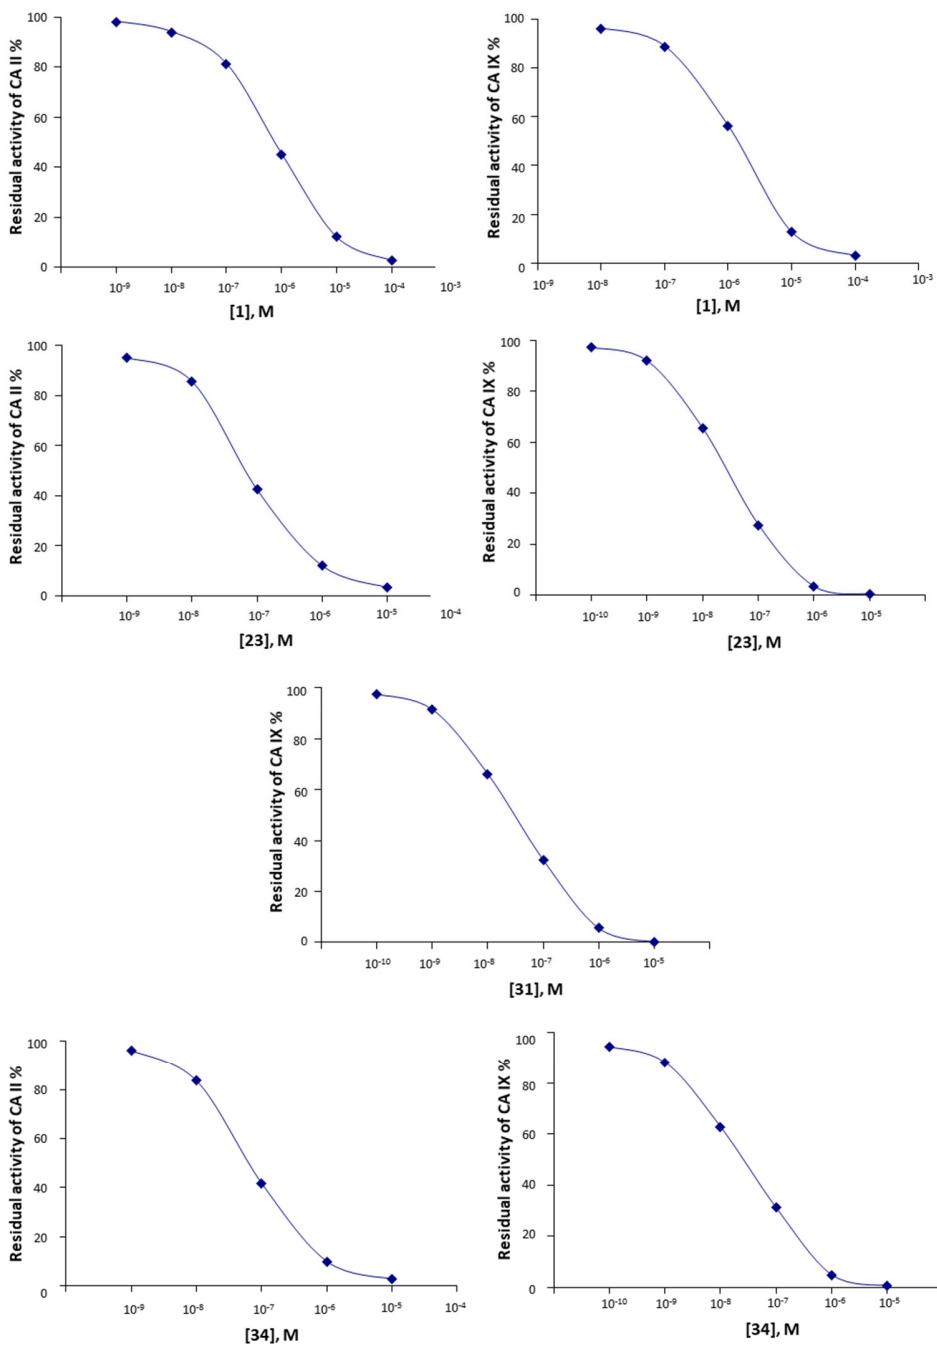

Fig. S5. Concentration-inhibition curves of 1, 23, 31 and 34 on CA II and CA IX, respectively.

LC-MS data for the selected compounds:

Compound 23:

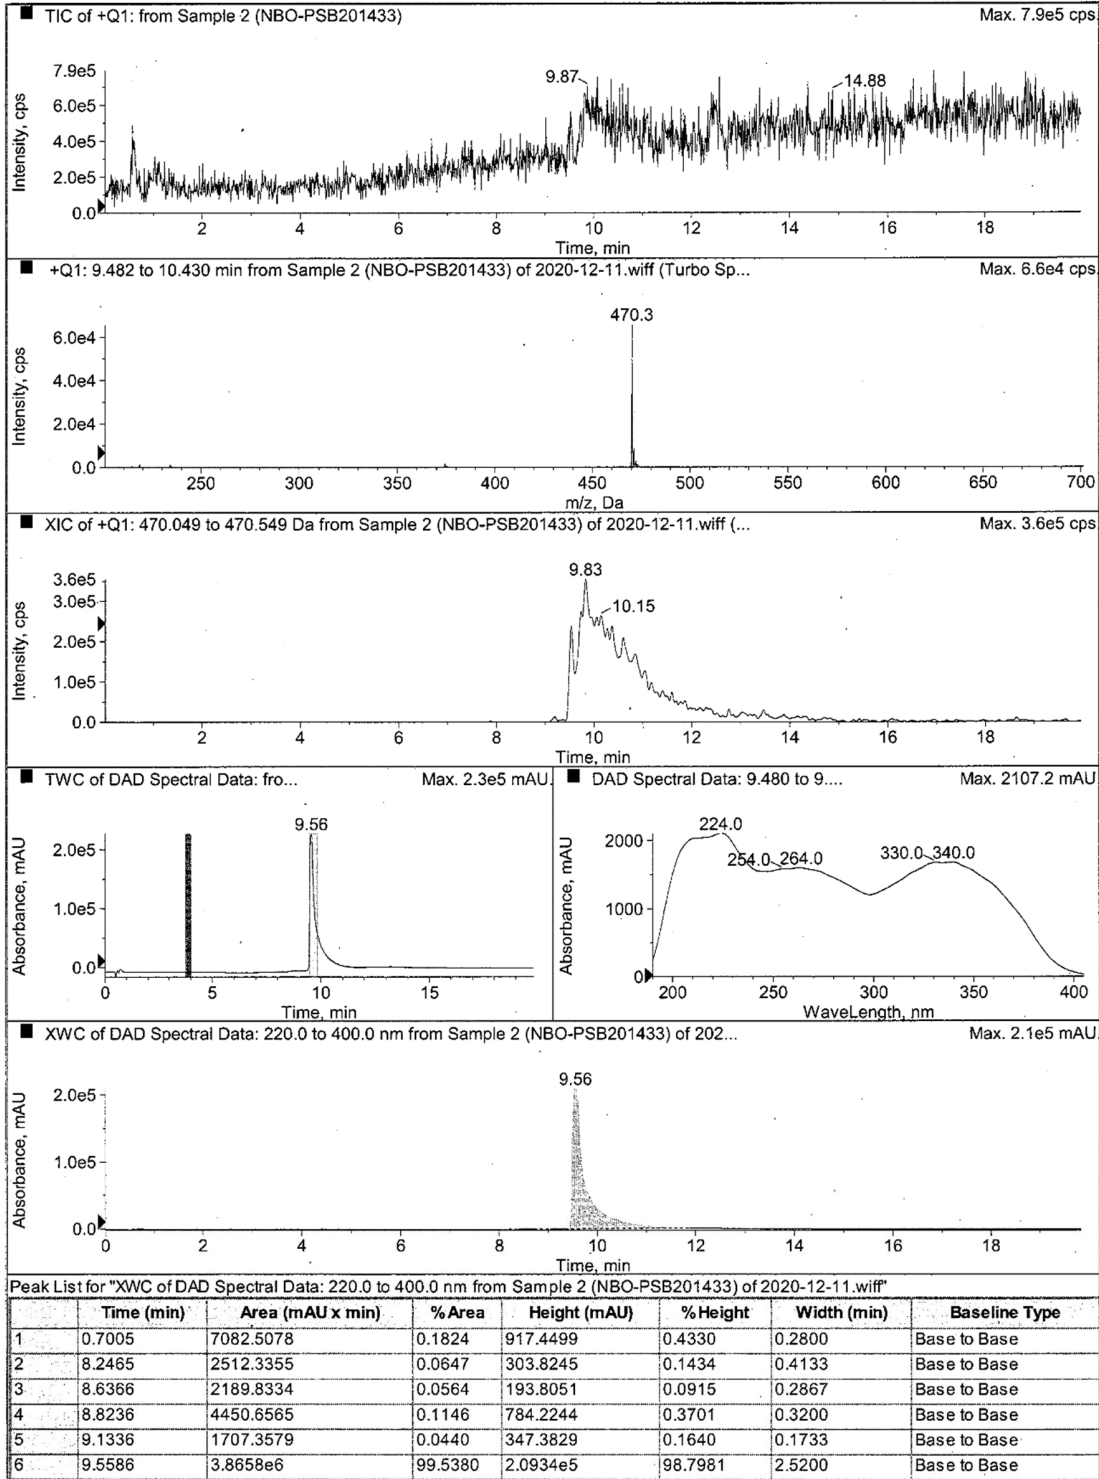

**Compound 6a:**

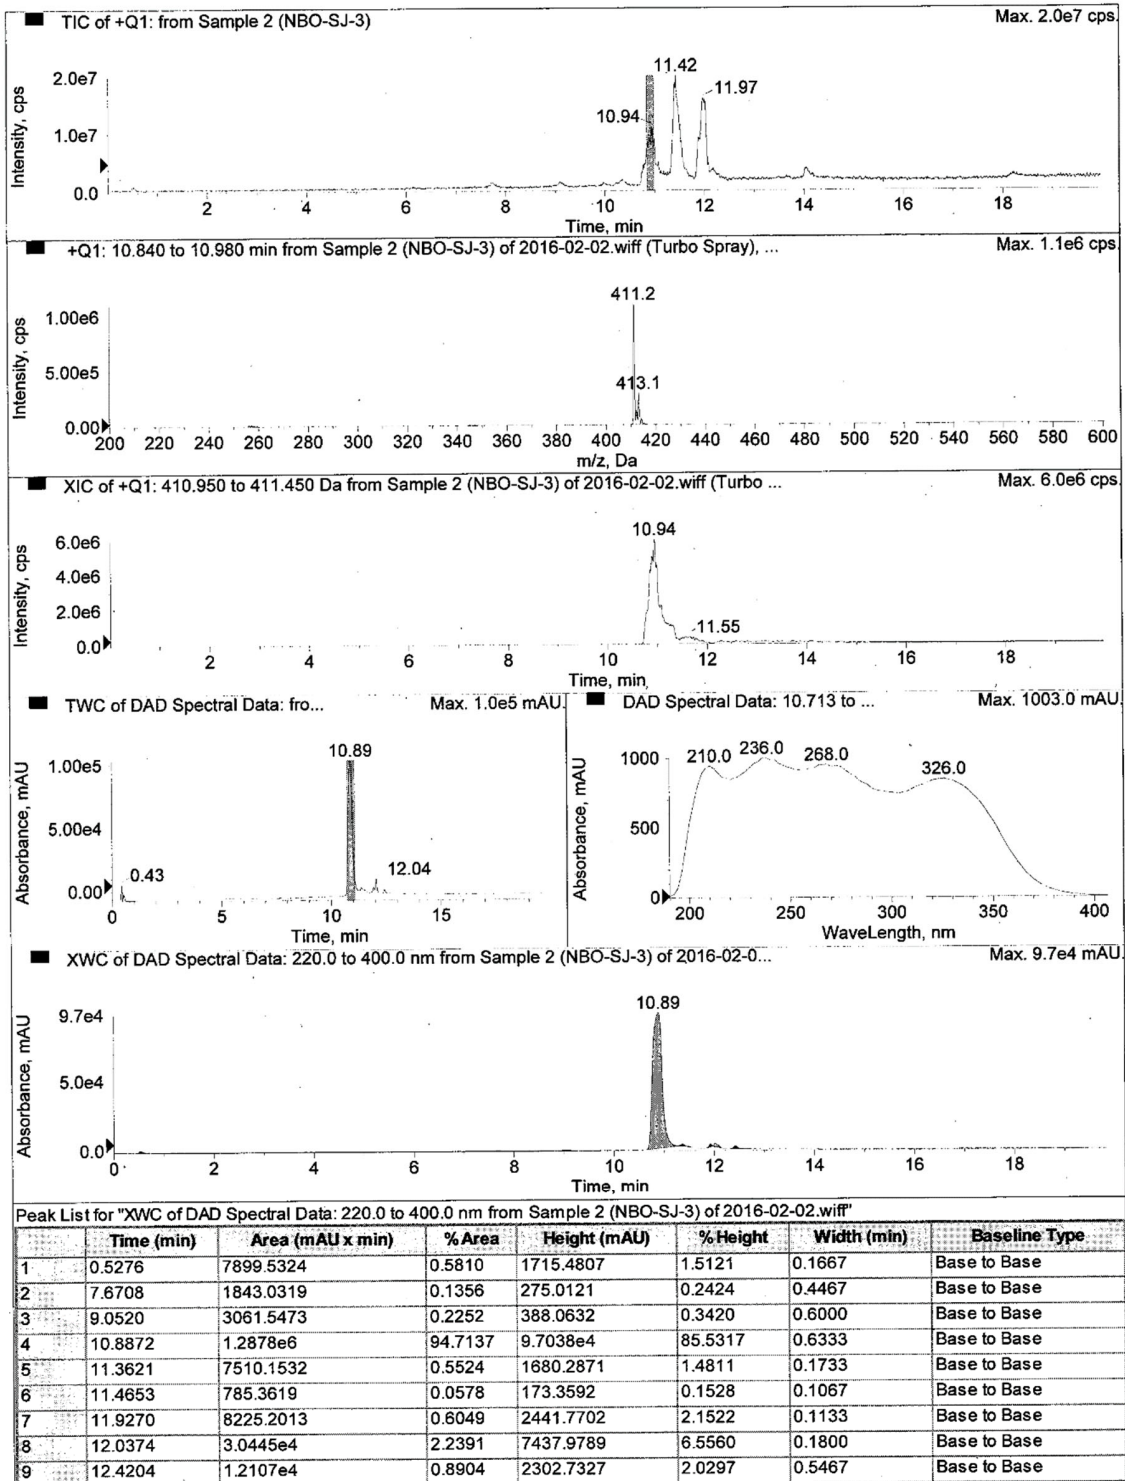

**Compound 6b:**

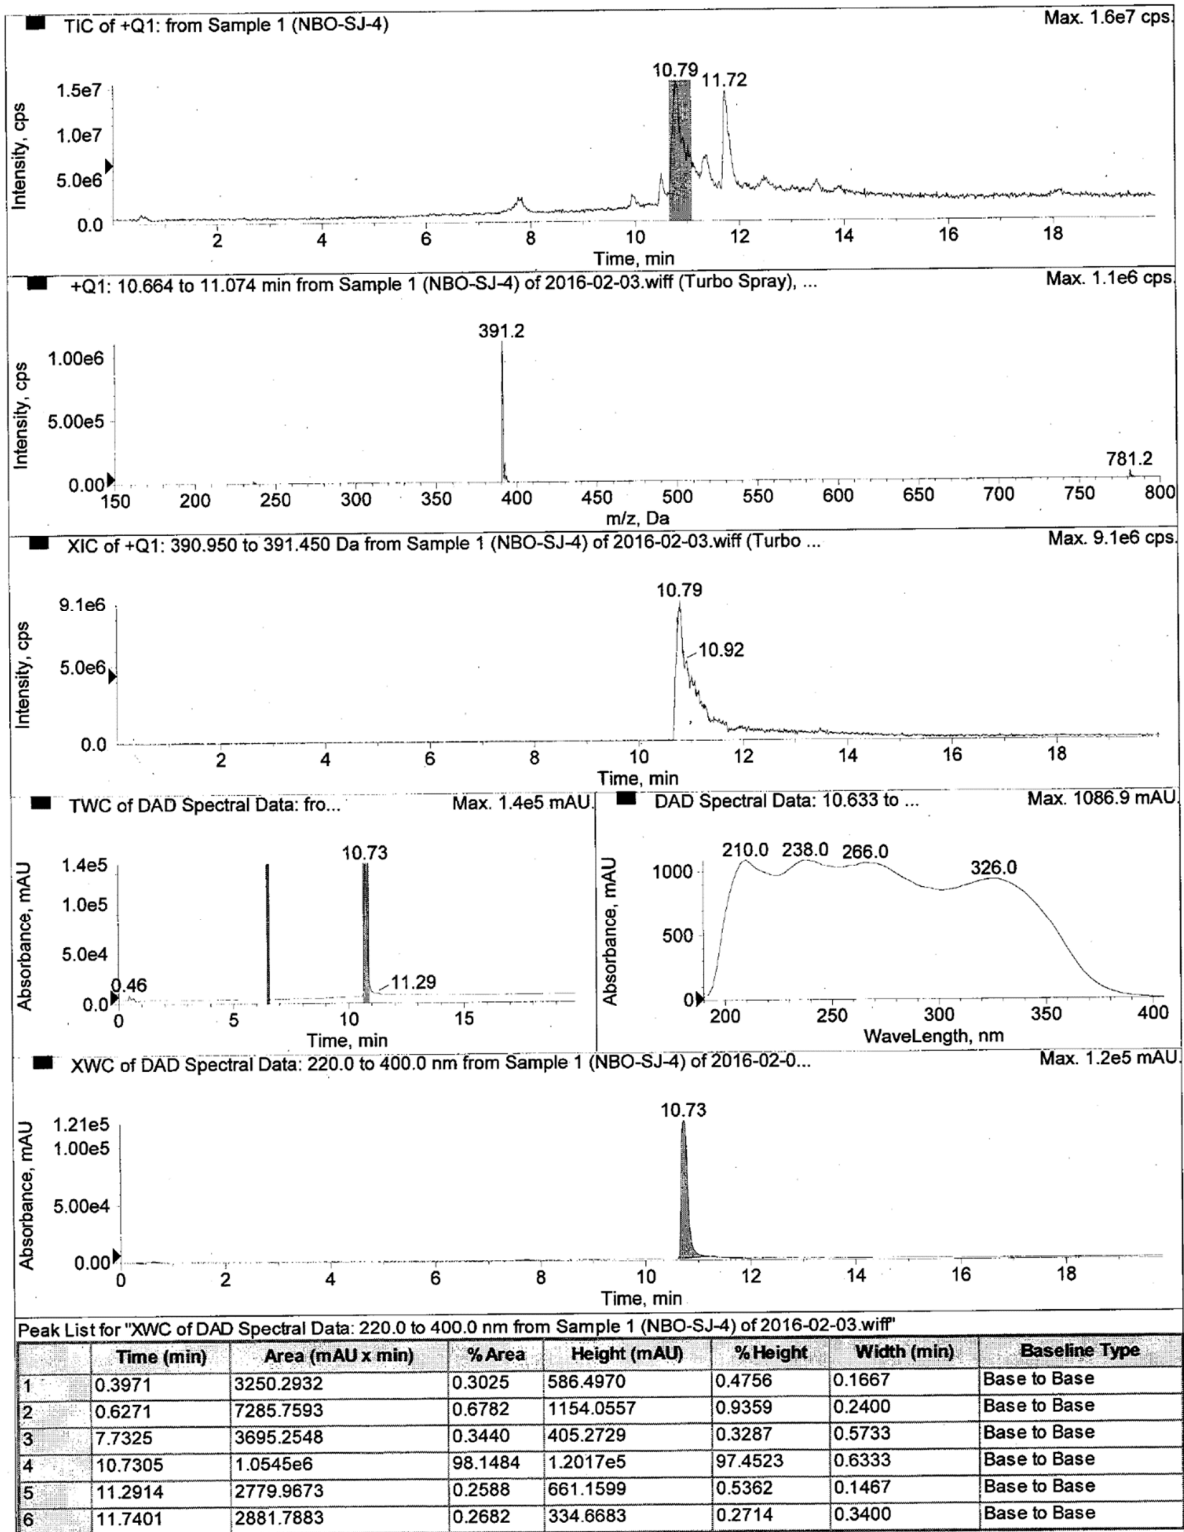

**Compound 6d:**

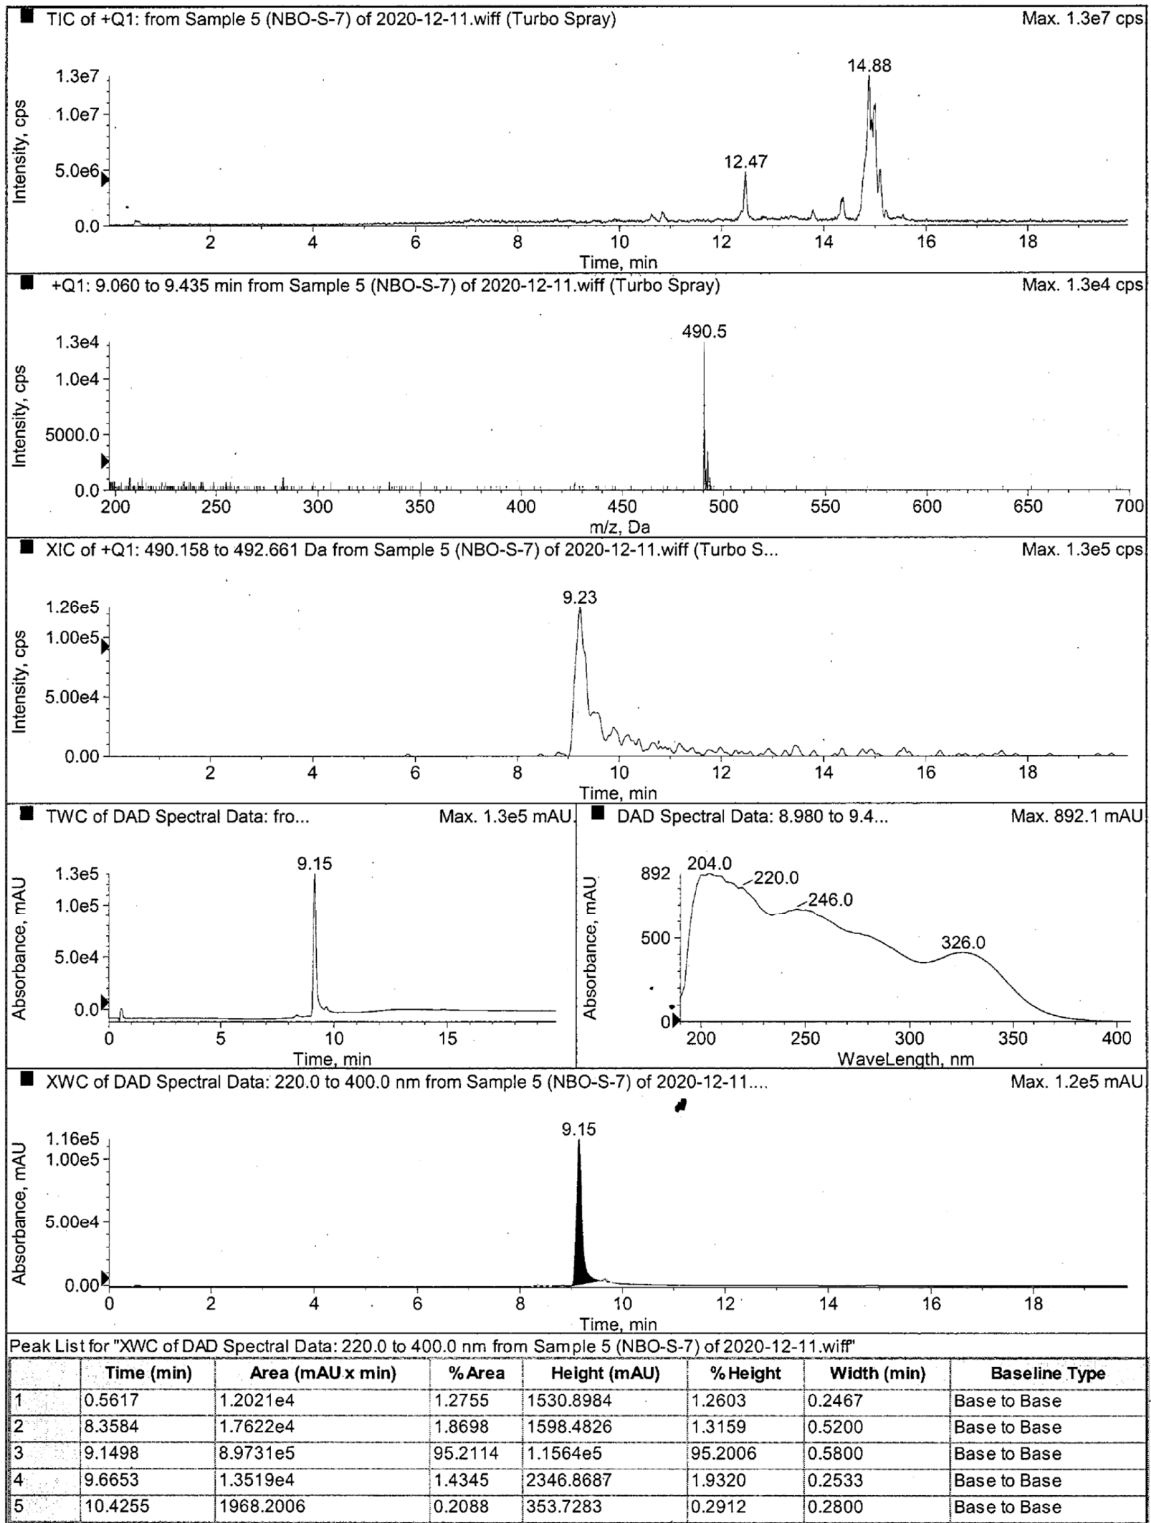

**Compound 6c:**

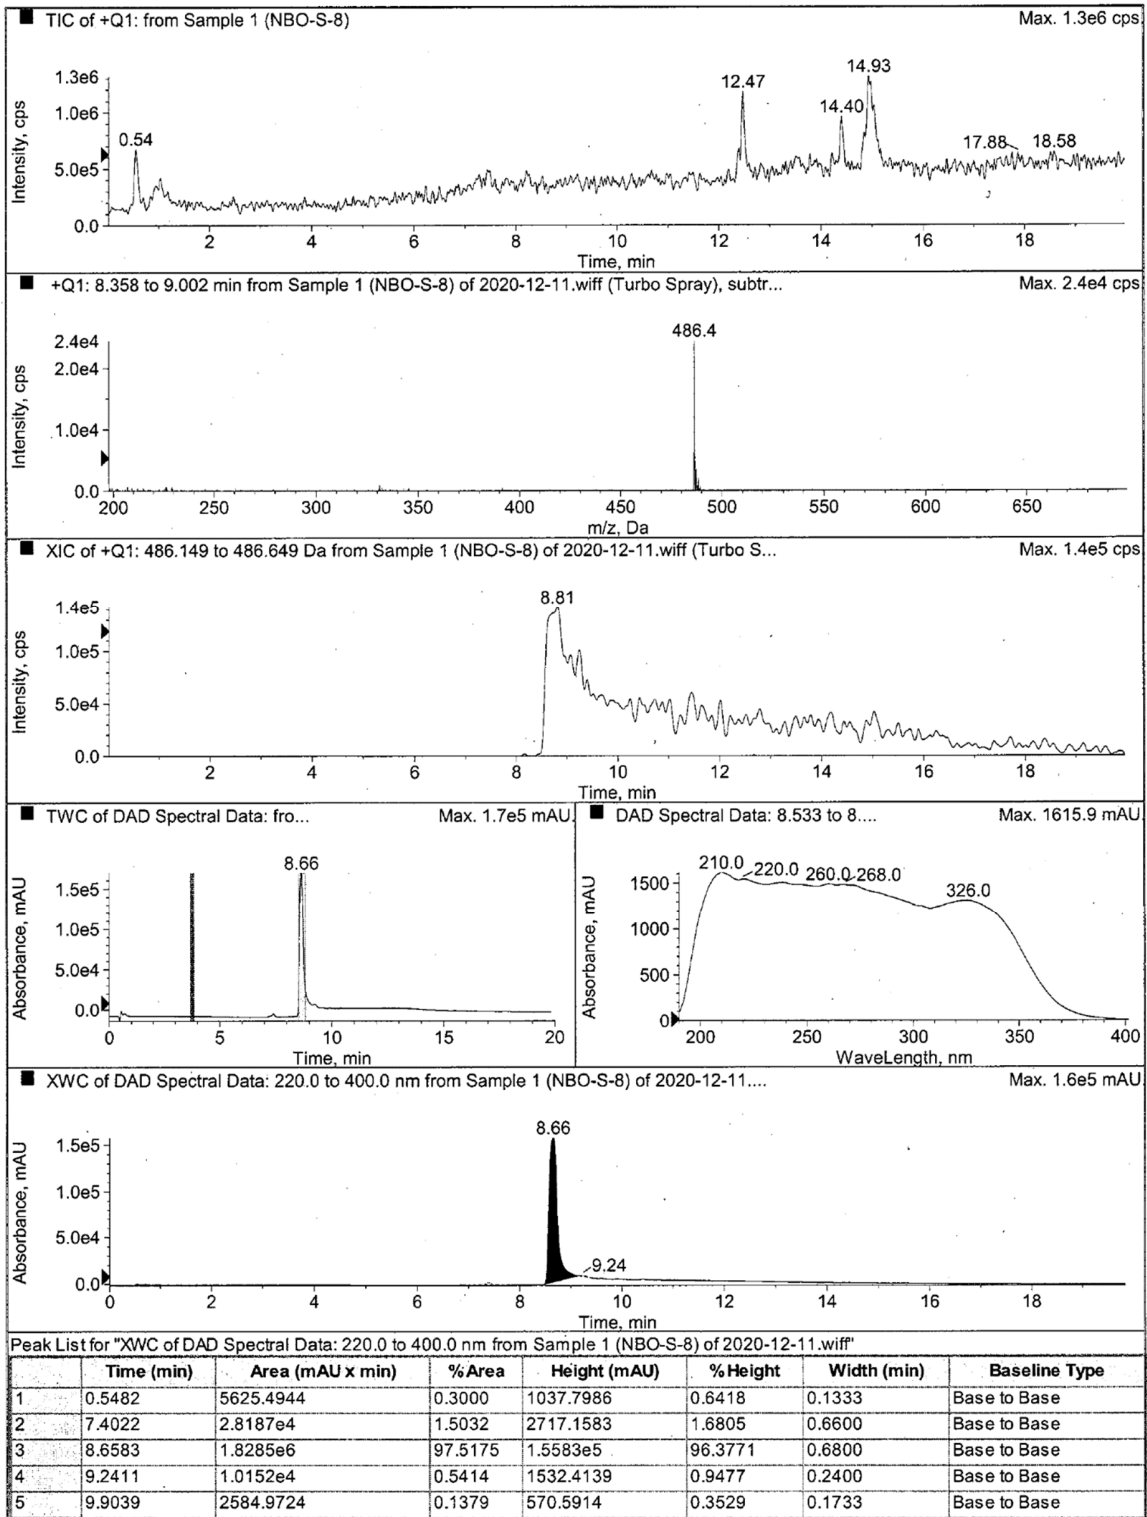

**Compound 6f:**

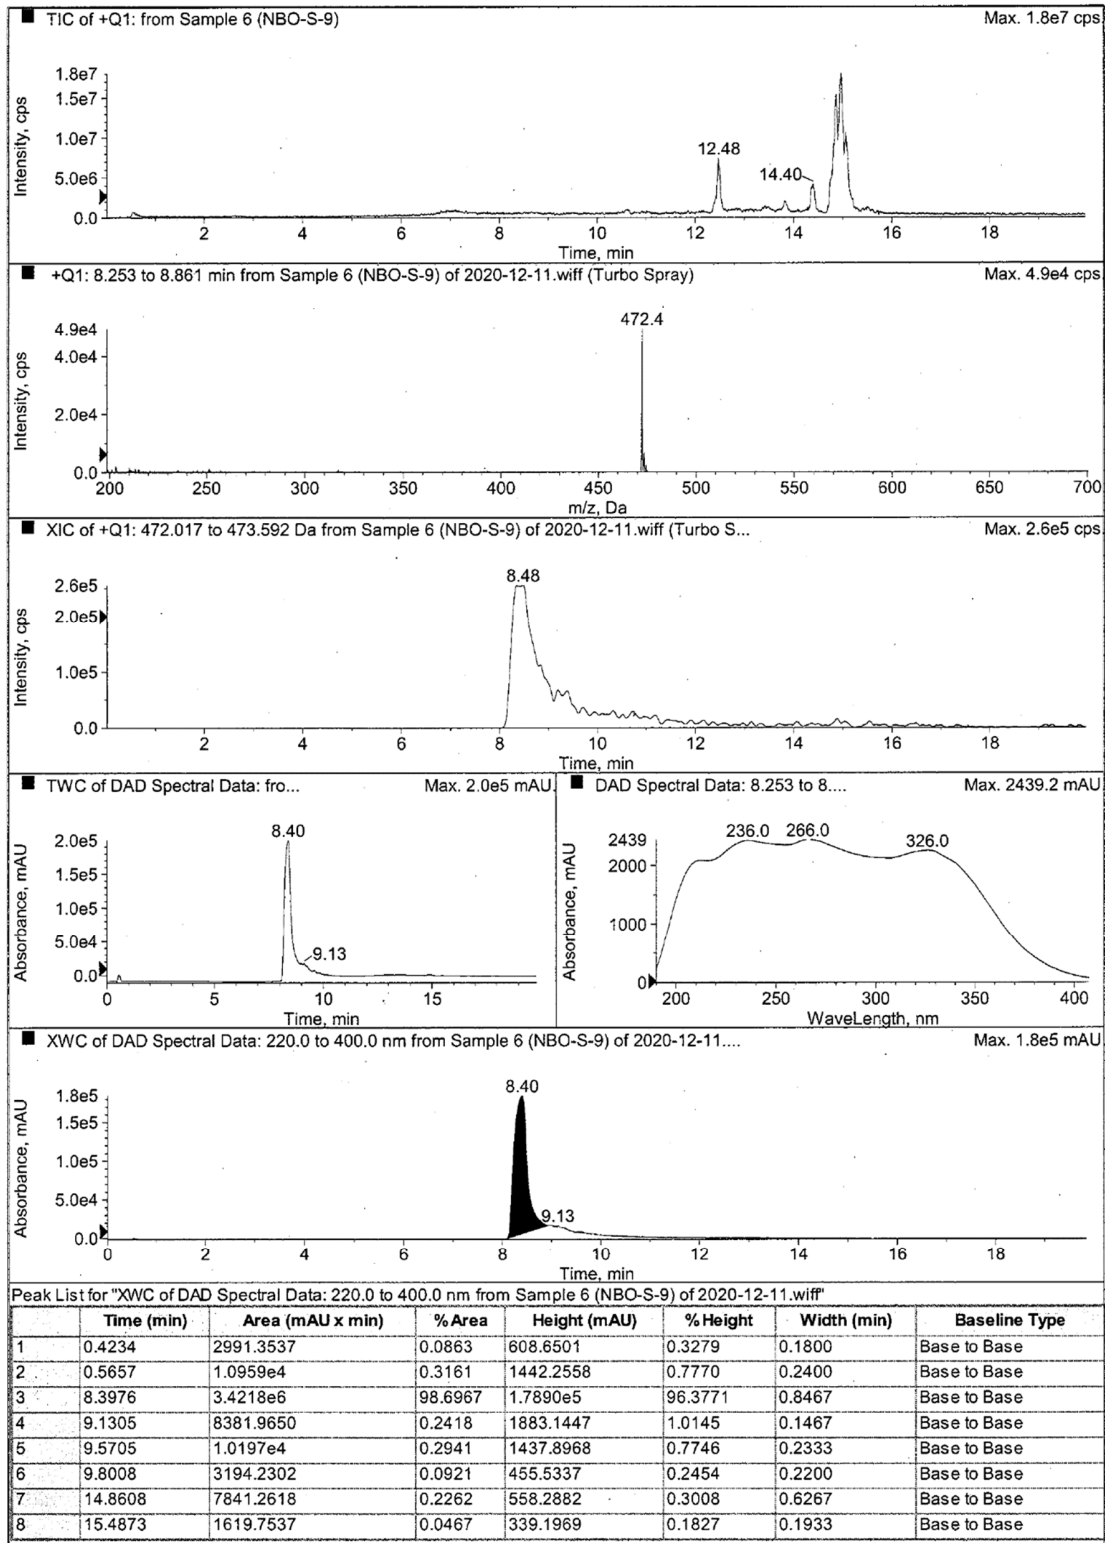

**Compound 6g:**

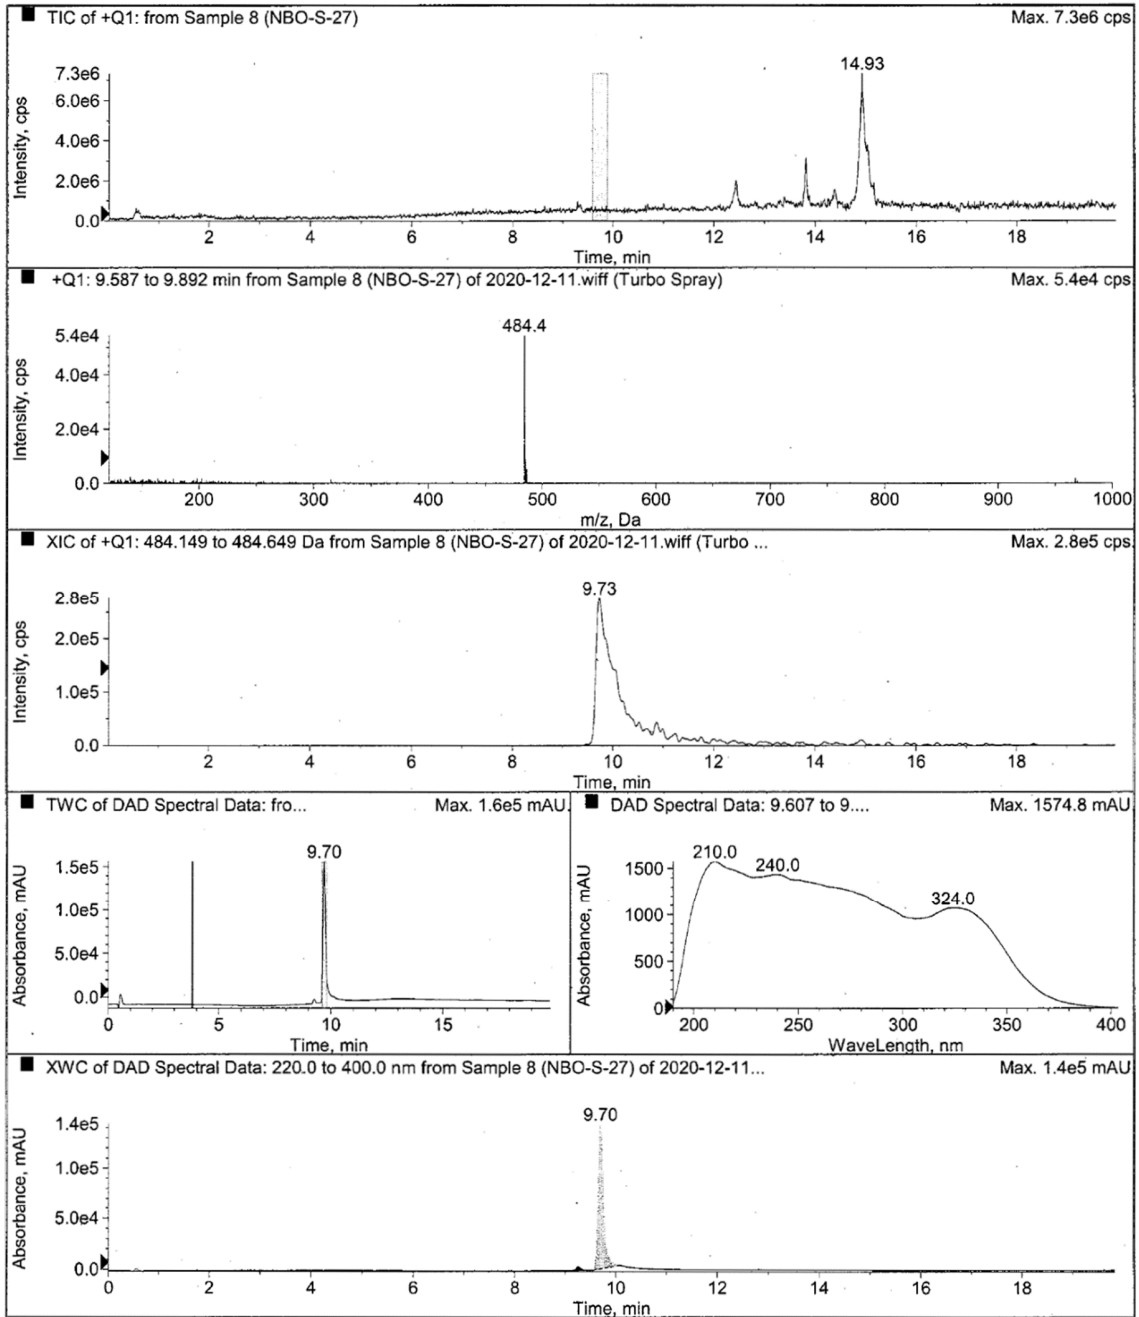

Peak List for "XWC of DAD Spectral Data: 220.0 to 400.0 nm from Sample 8 (NBO-S-27) of 2020-12-11.wiff"

|   | Time (min) | Area (mAU x min) | %Area   | Height (mAU) | %Height | Width (min) | Baseline Type |
|---|------------|------------------|---------|--------------|---------|-------------|---------------|
| 1 | 0.4110     | 4555.4102        | 0.4003  | 903.0727     | 0.6010  | 0.1600      | Base to Base  |
| 2 | 0.5587     | 1.5438e4         | 1.3566  | 2072.6267    | 1.3793  | 0.2400      | Base to Base  |
| 3 | 9.2571     | 2.4010e4         | 2.1099  | 3679.3756    | 2.4485  | 0.5333      | Base to Base  |
| 4 | 9.6973     | 1.0916e6         | 95.9244 | 1.4315e5     | 95.2624 | 0.5133      | Base to Base  |
| 5 | 10.1082    | 2376.9376        | 0.2089  | 464.2406     | 0.3089  | 0.1467      | Base to Base  |



**Compound 11:**

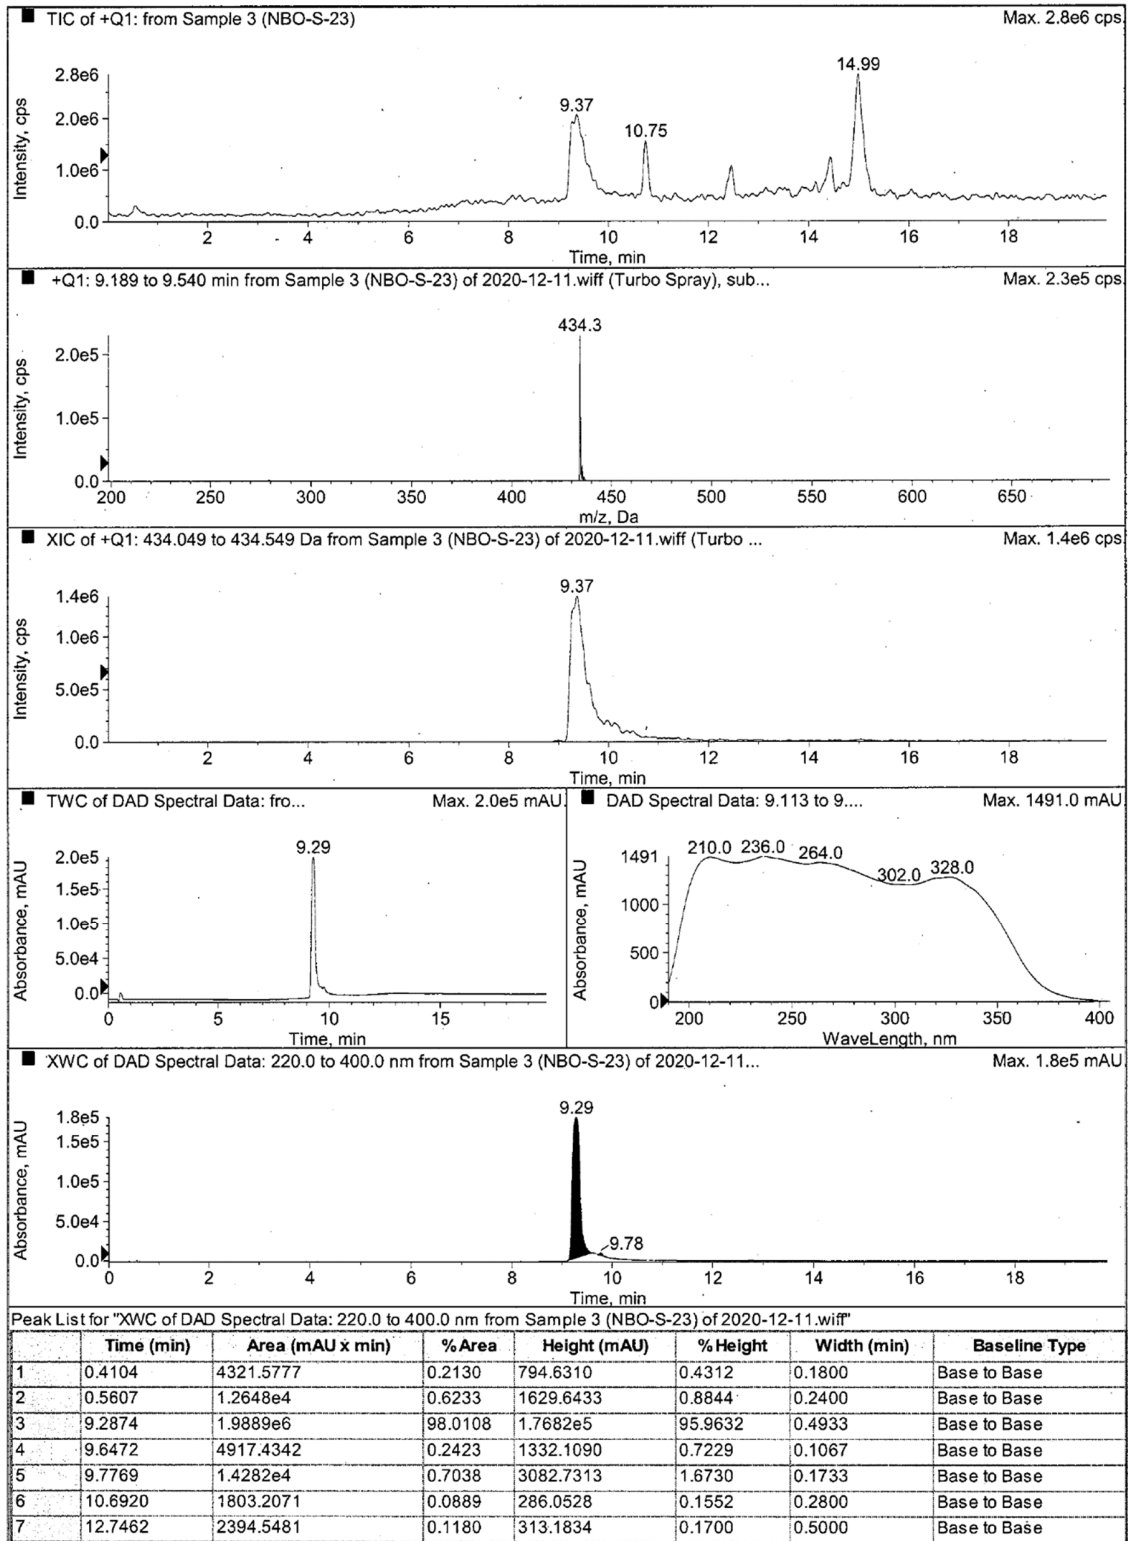

**Compound 15:**

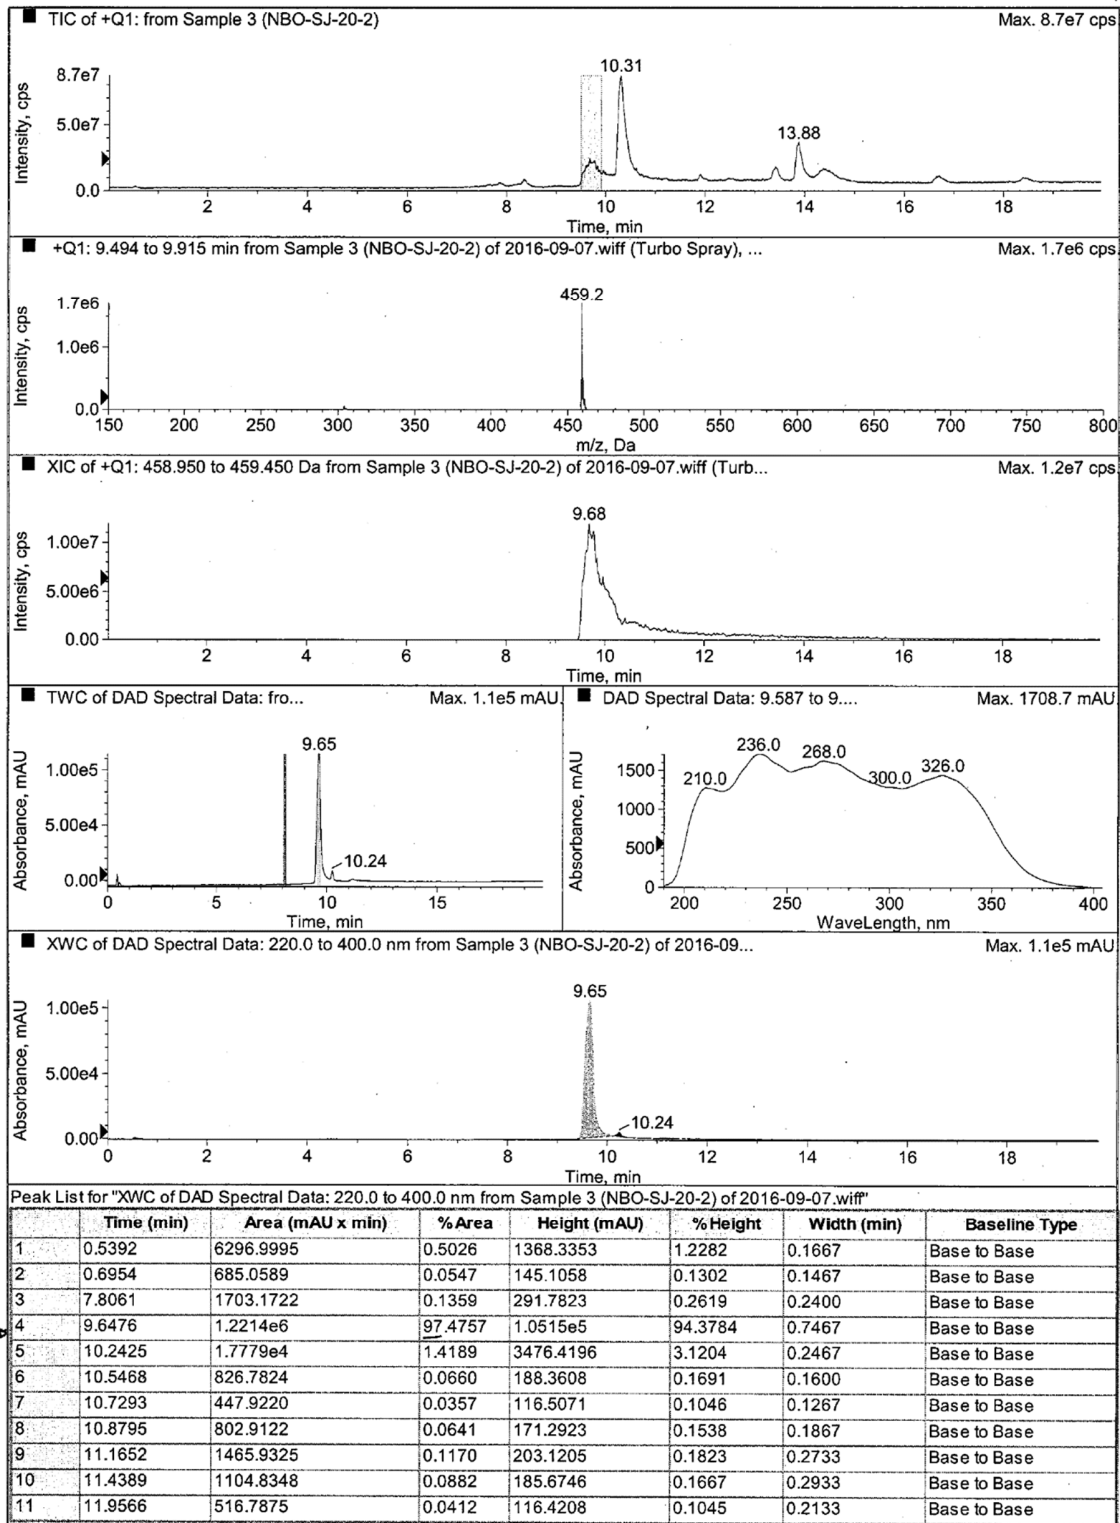

# NMR data for the selected compounds

## Compd. 17

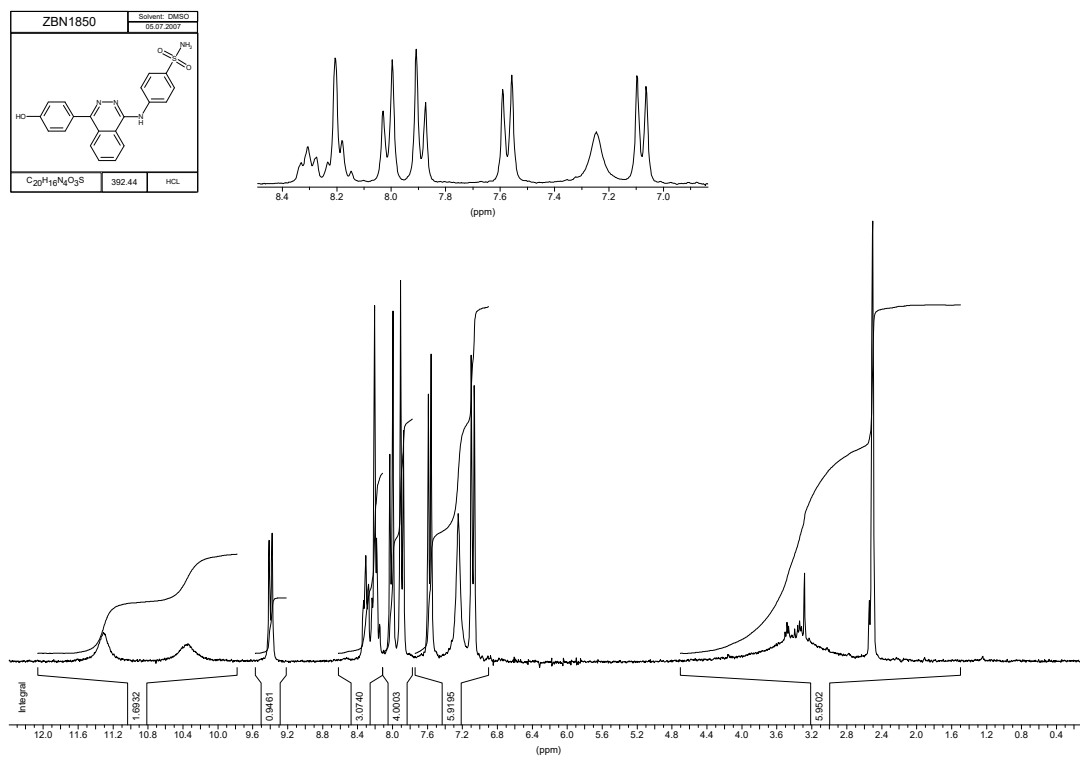

## Compd. 6a

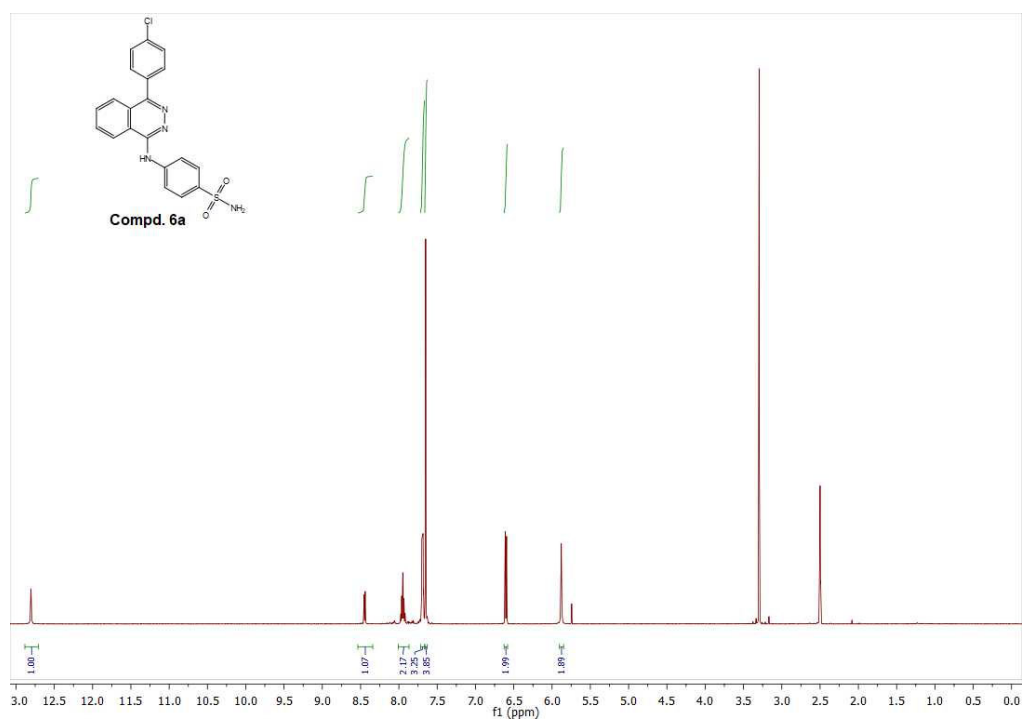



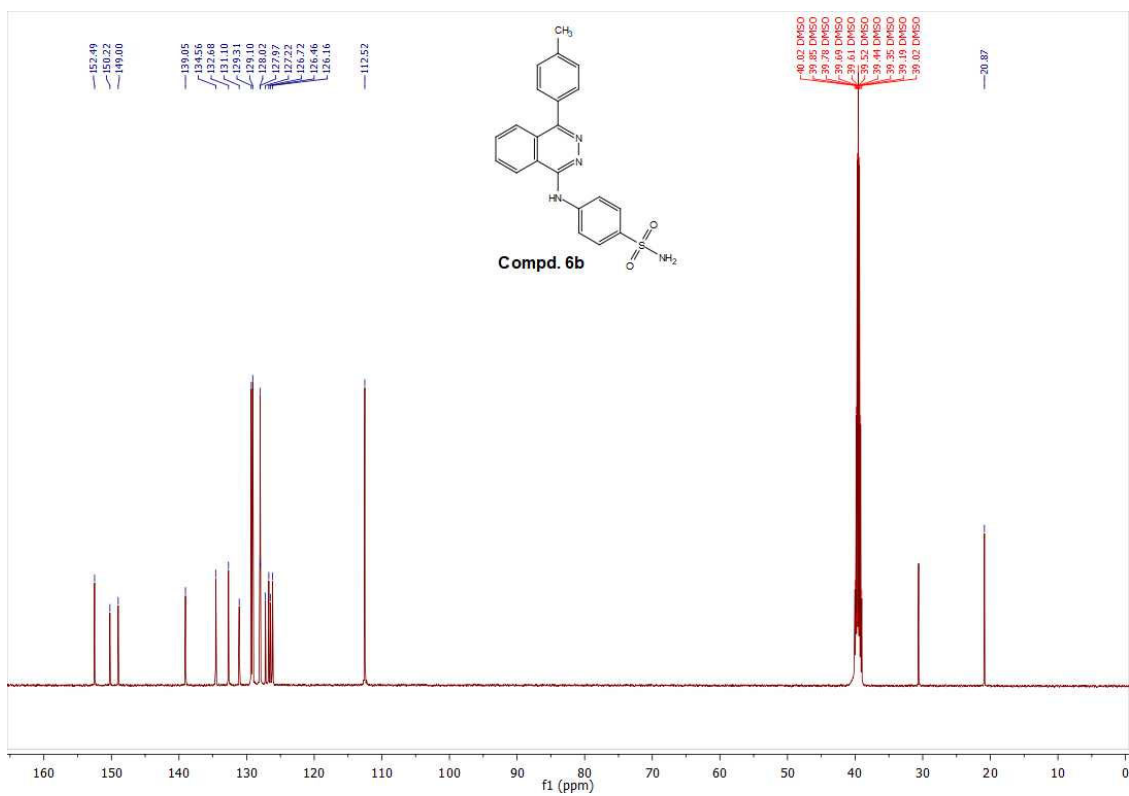

**Compd. 19**

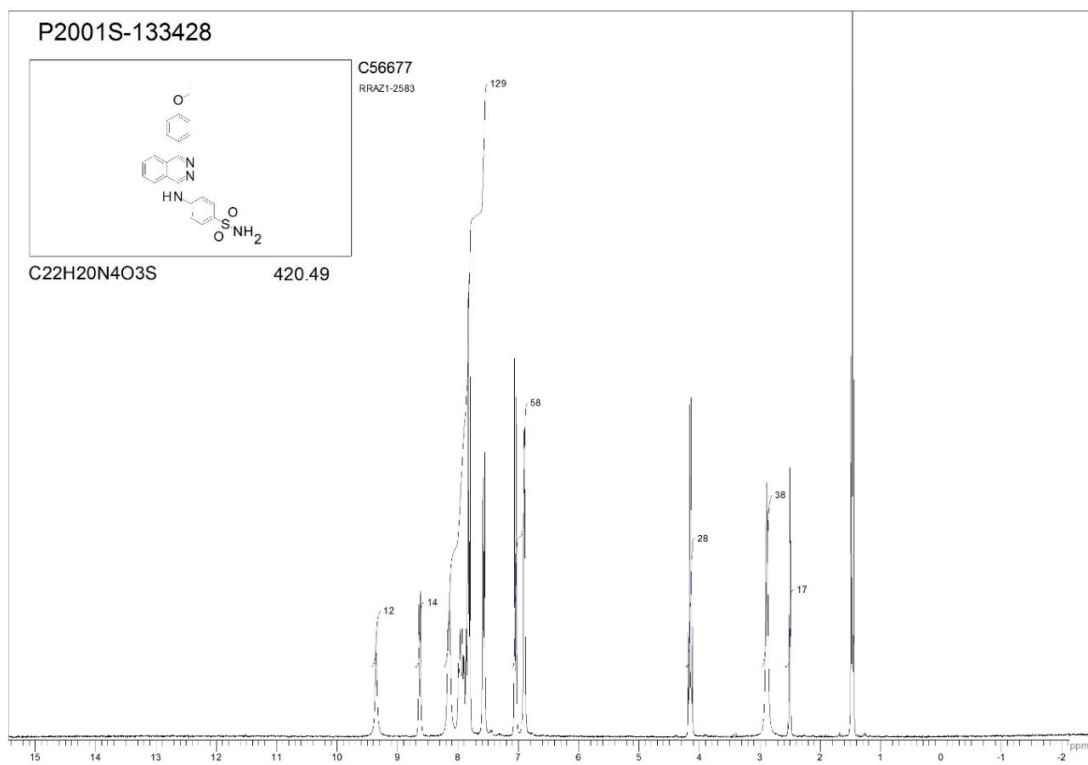

### Compd. 20

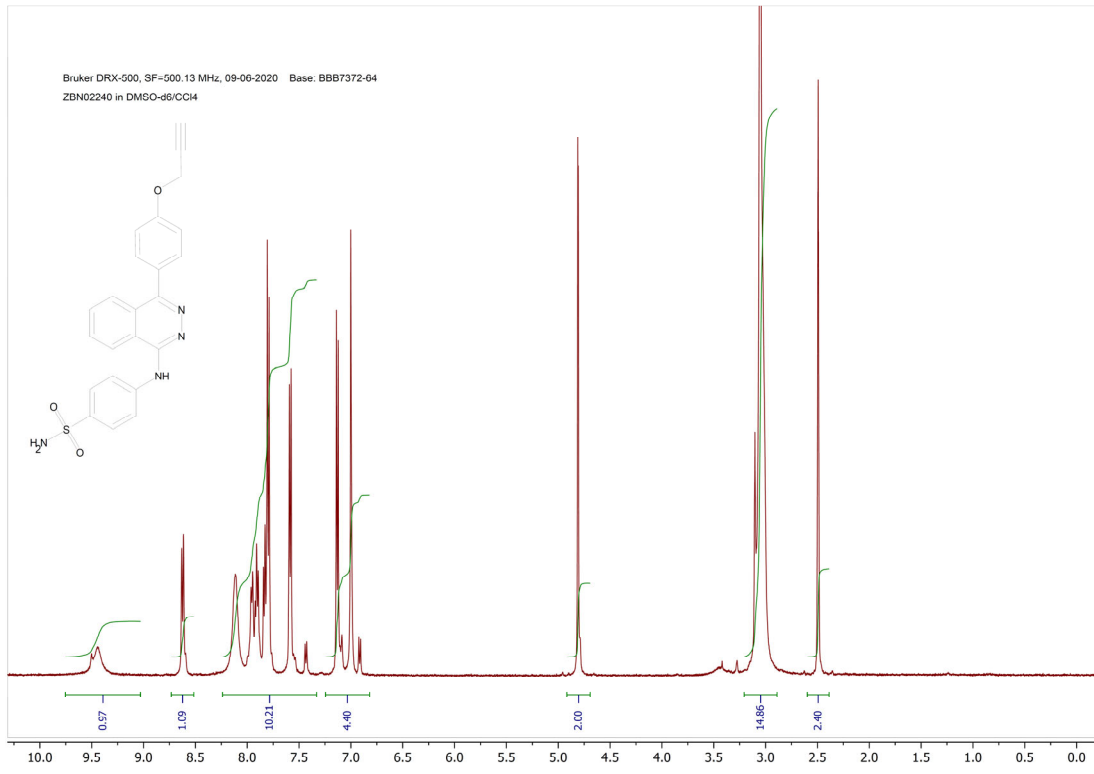

### Compd. 21

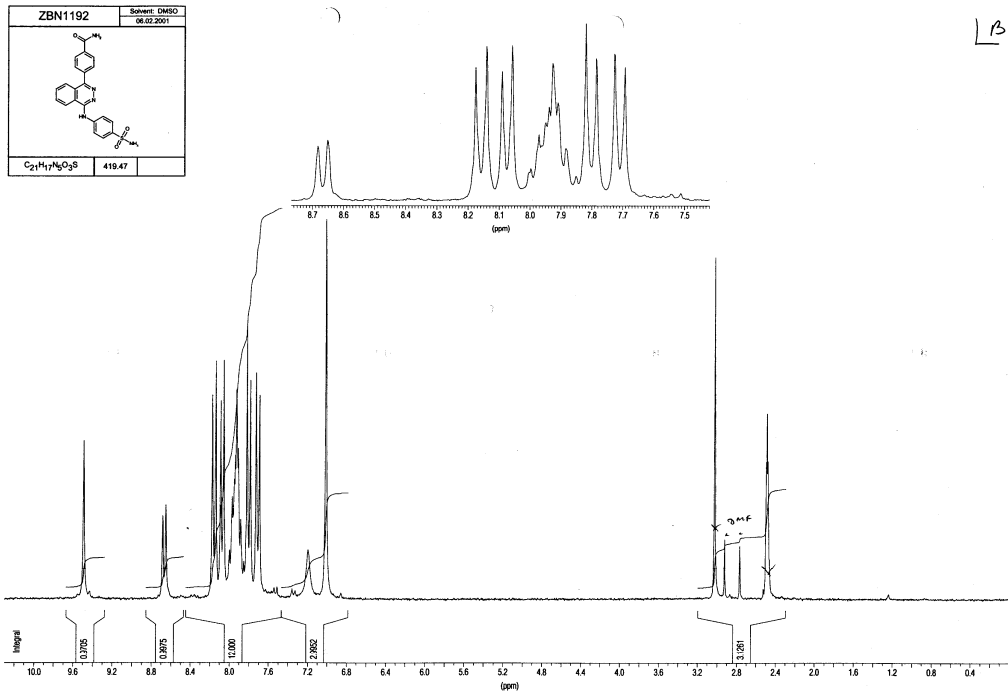

## Compd. 22

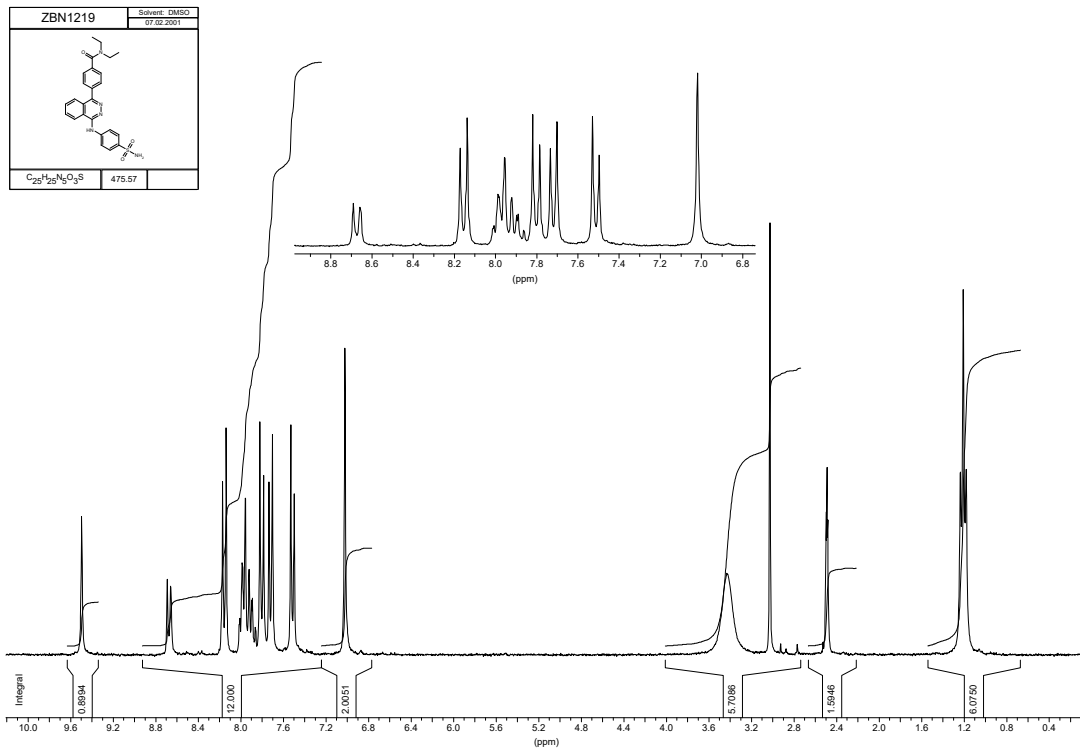

## Compd. 23

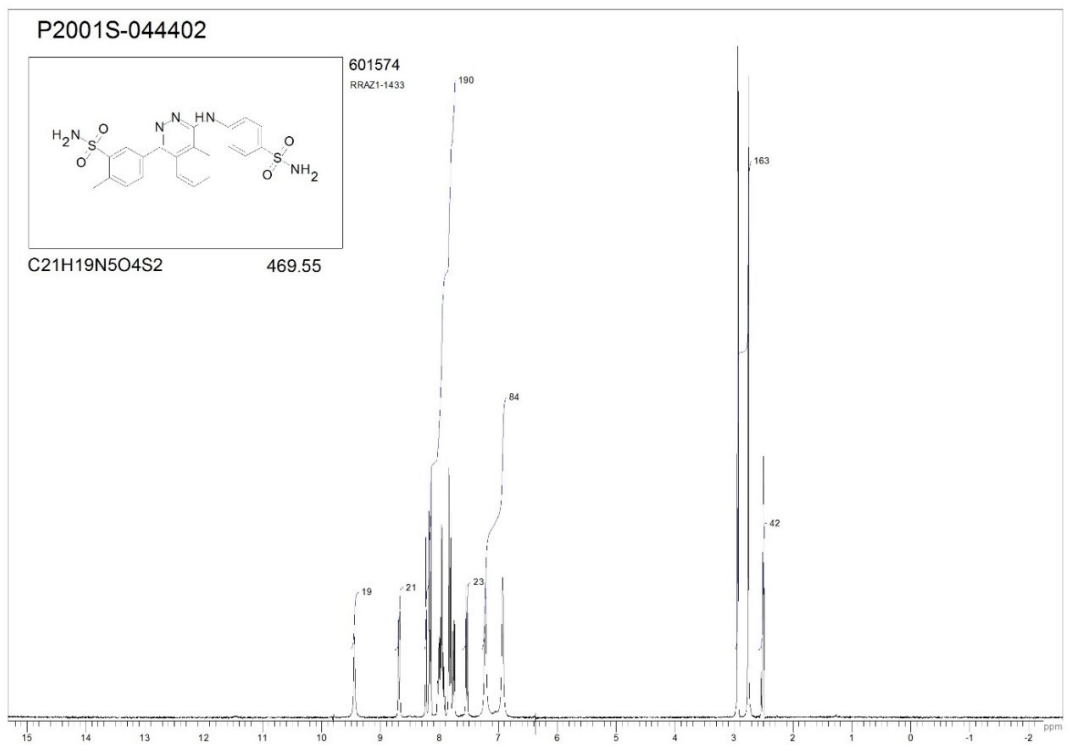

# Compd. 6c

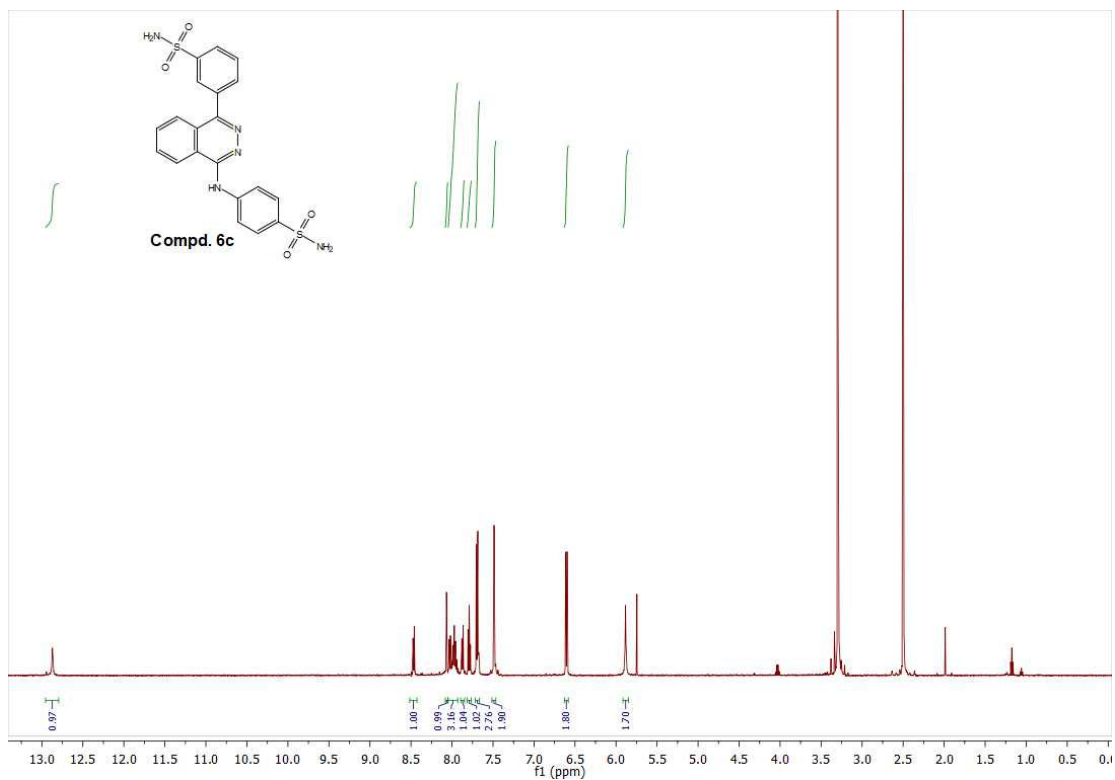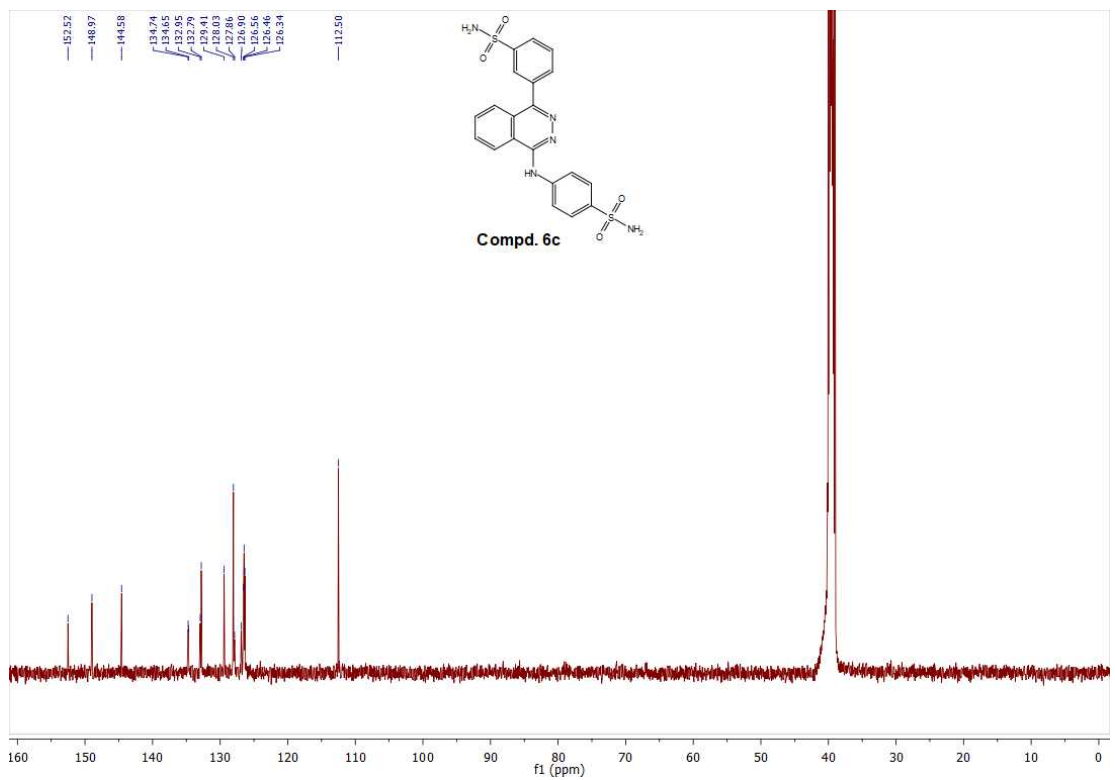



### Compd. 6d

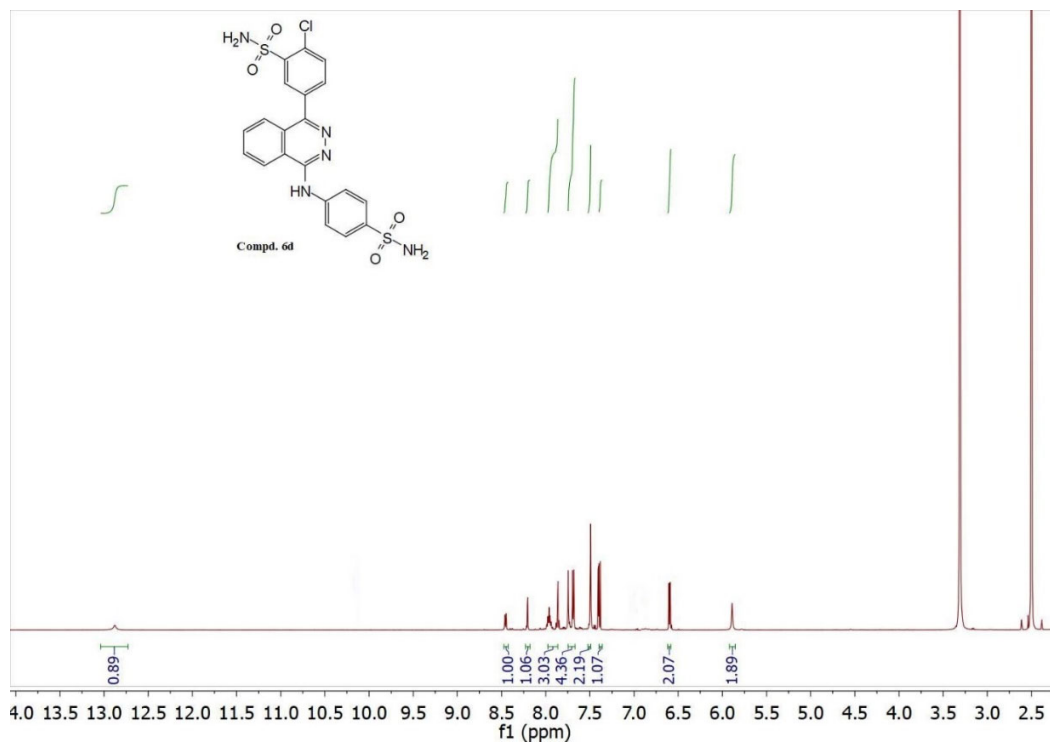

### Compd. 6e

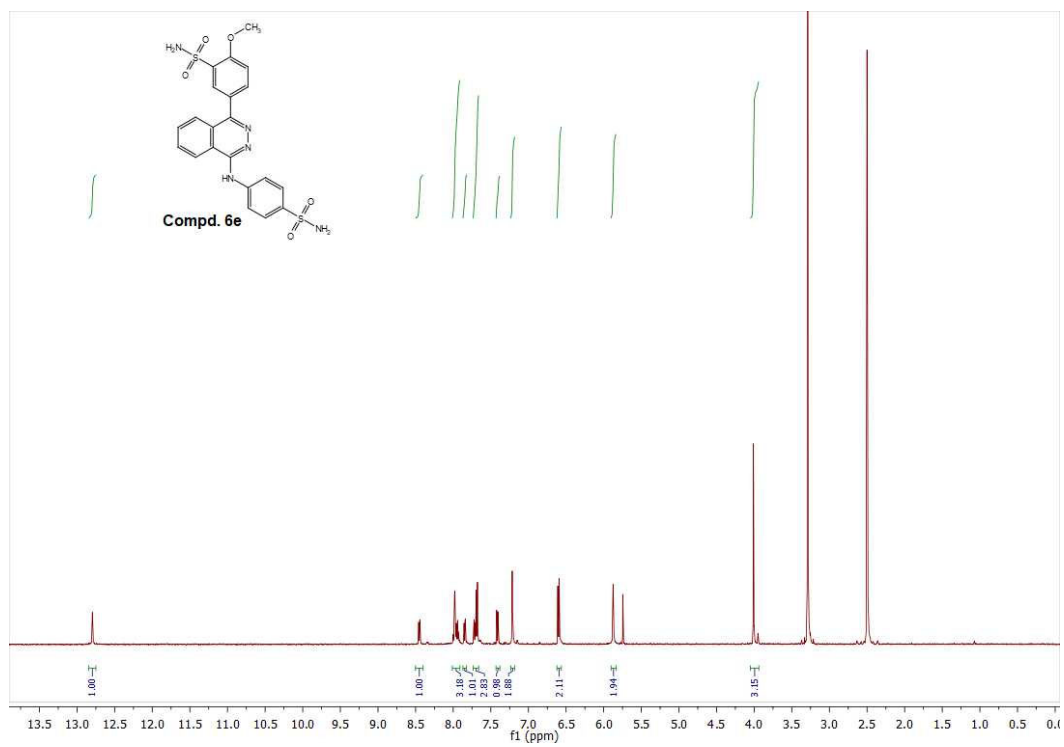

### Compd. 24

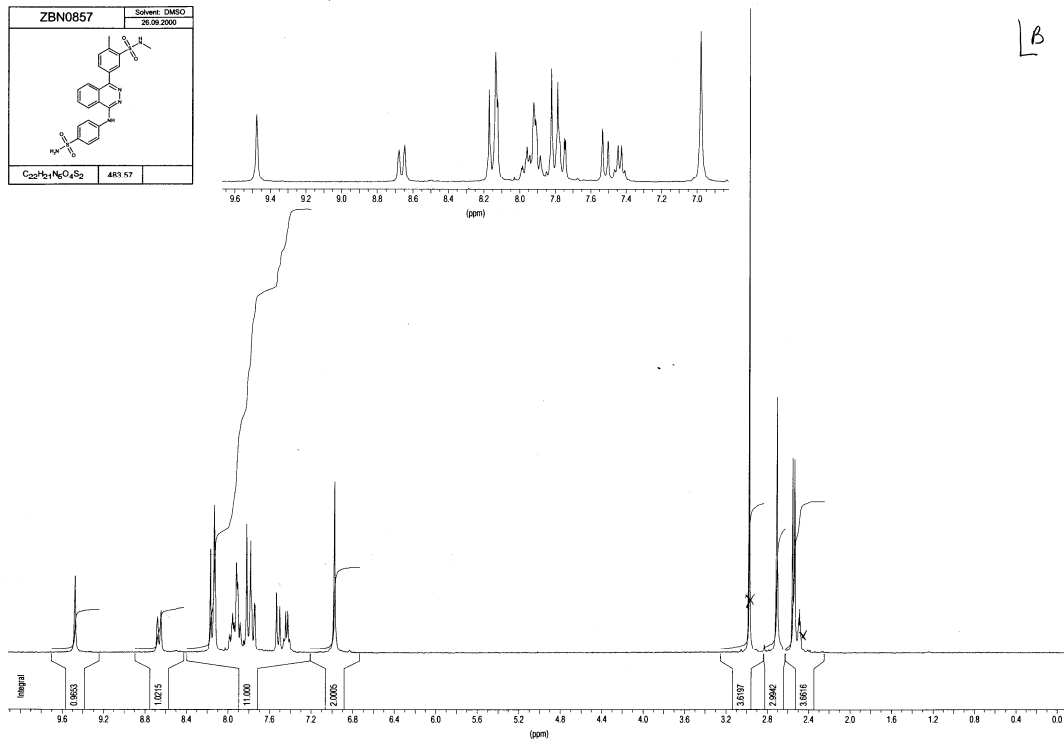

LB

### Compd. 25

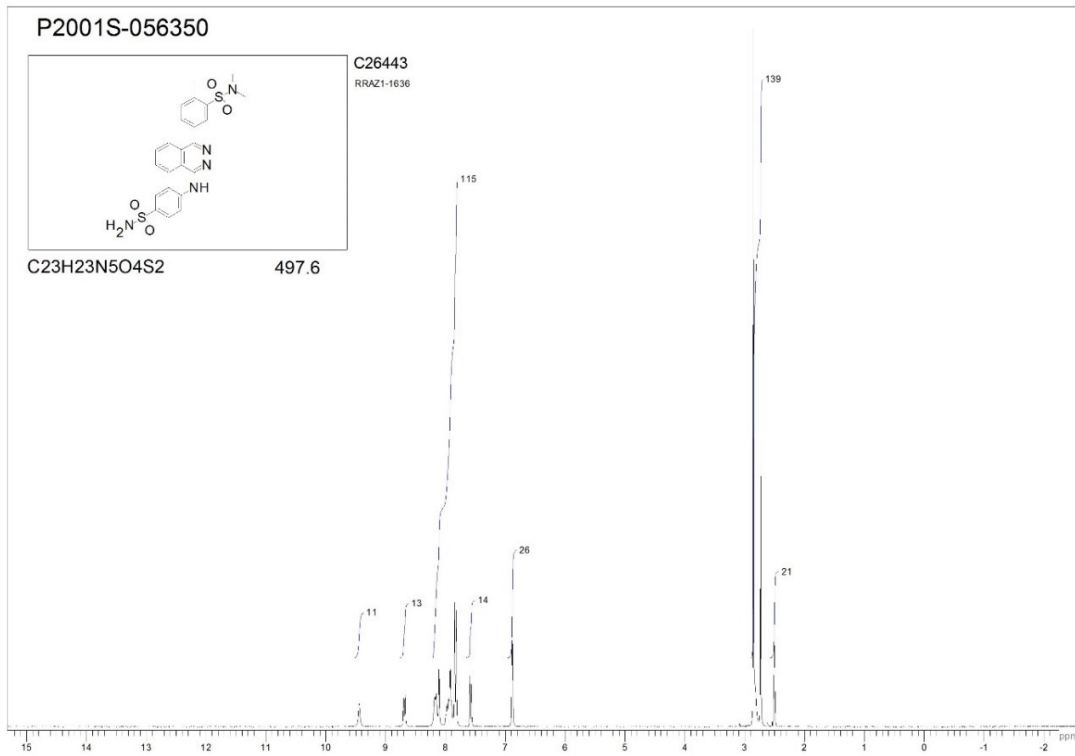

### Compd. 26

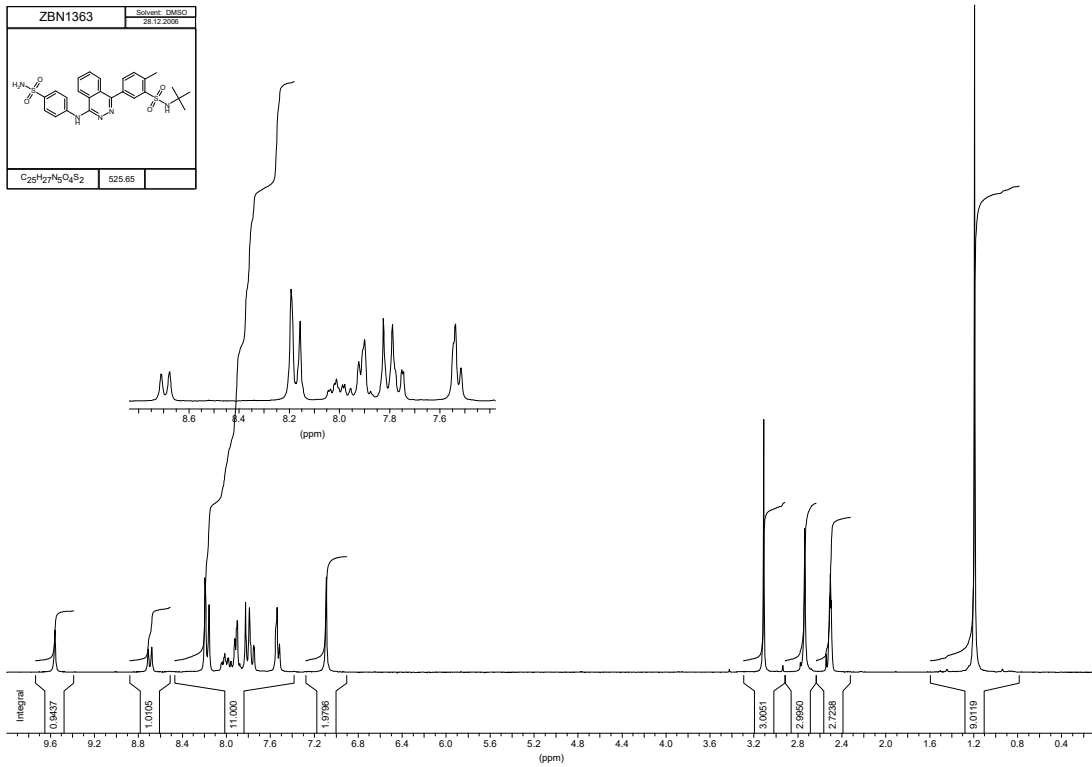

### Compd. 27

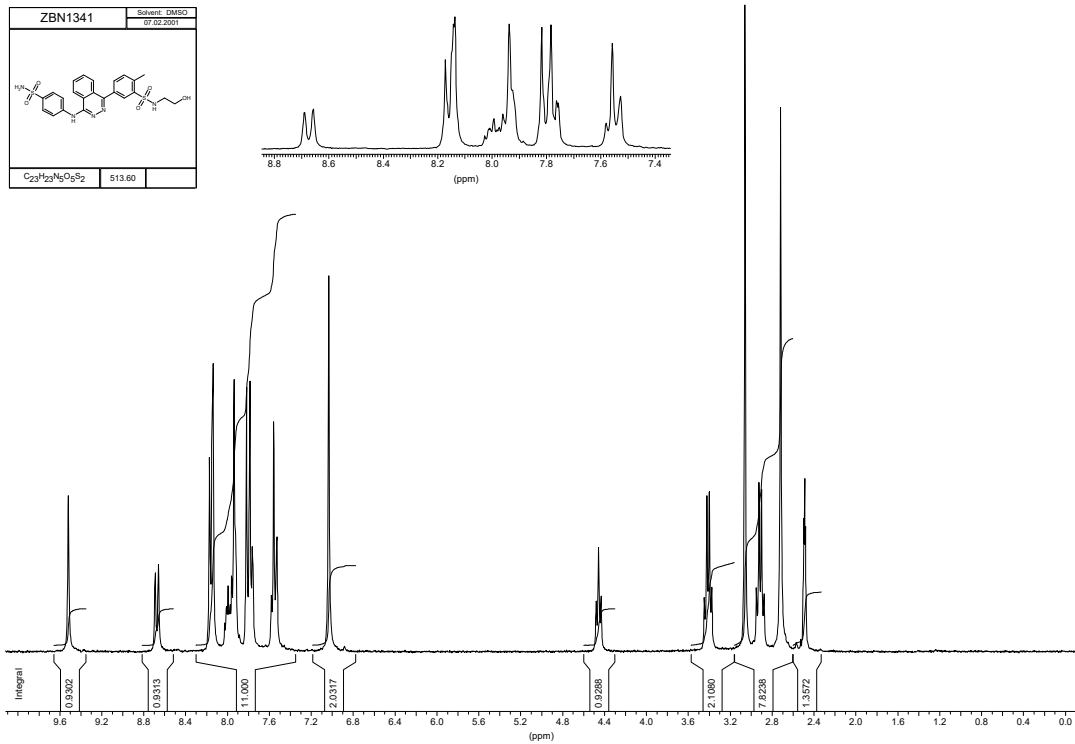

### Compd. 28

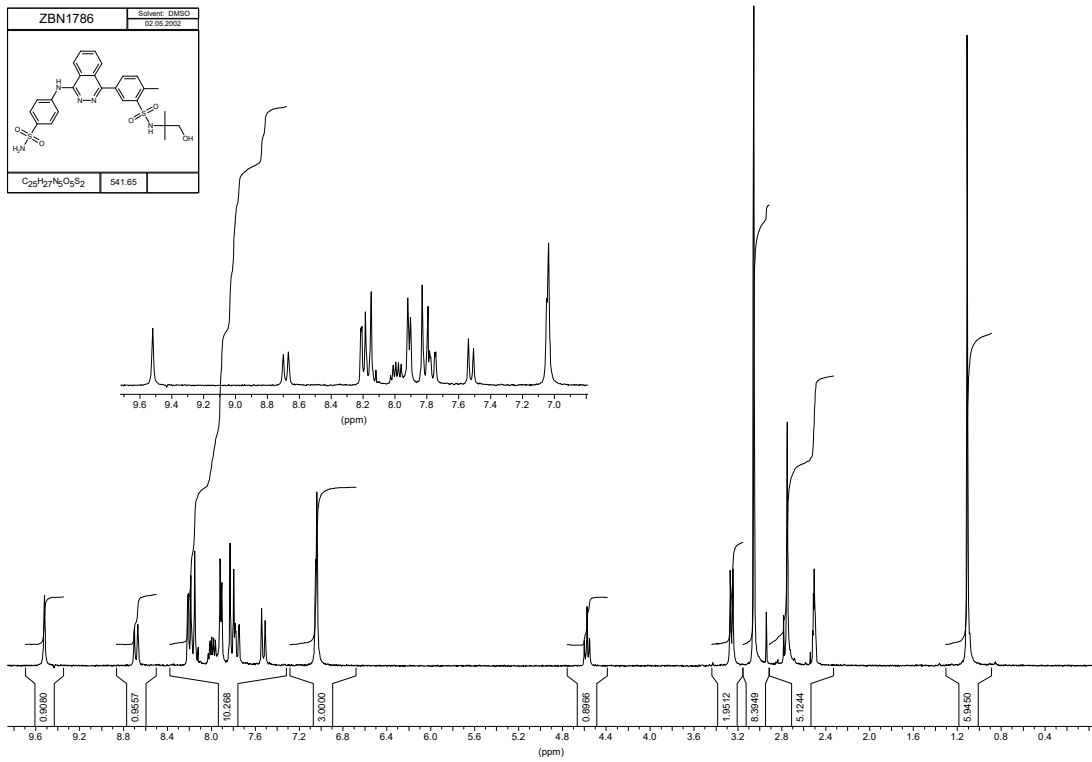

### Compd. 31

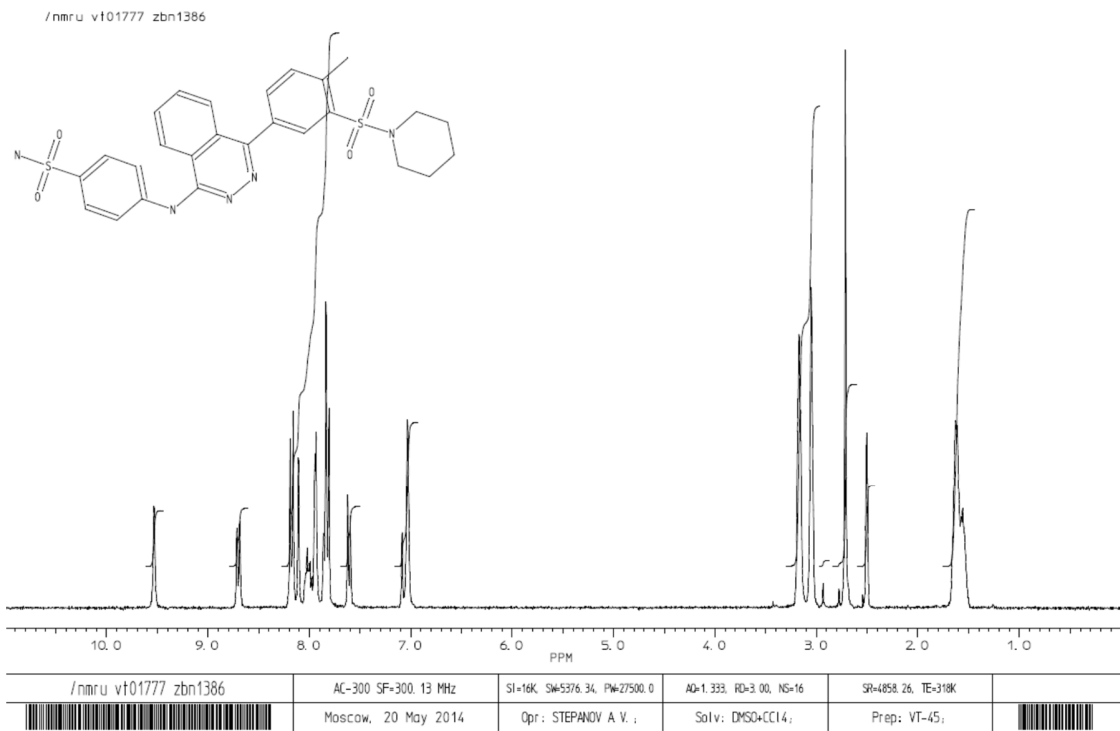

### Compd. 32

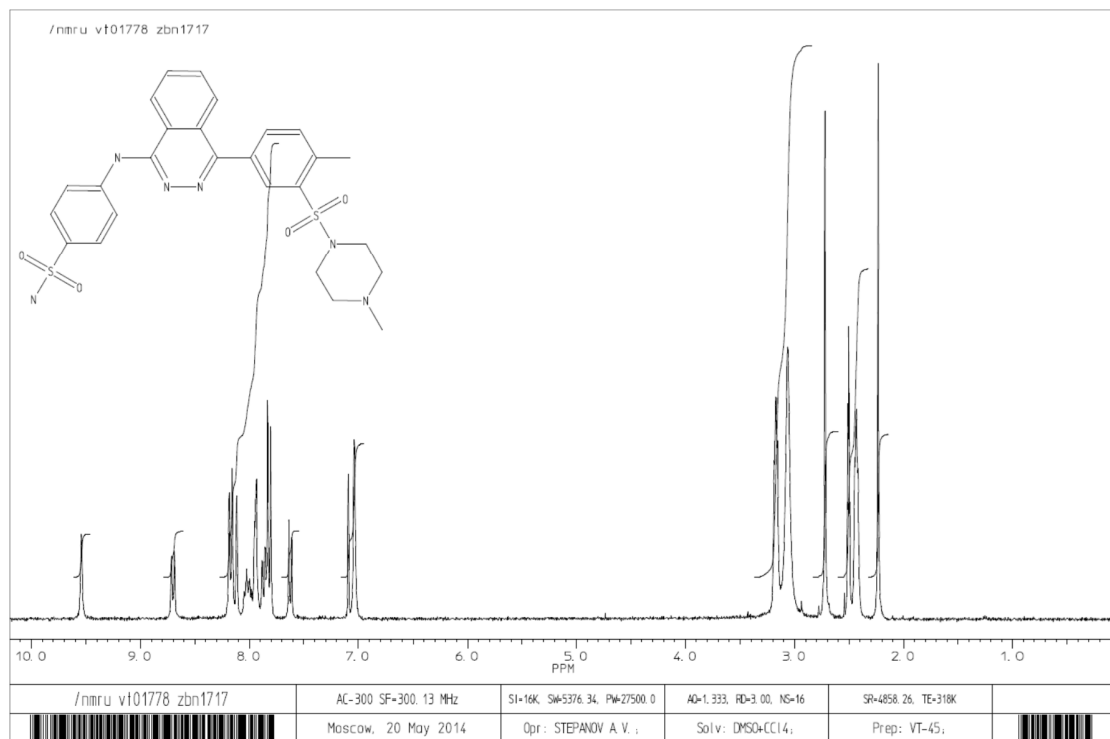

### Compd. 33

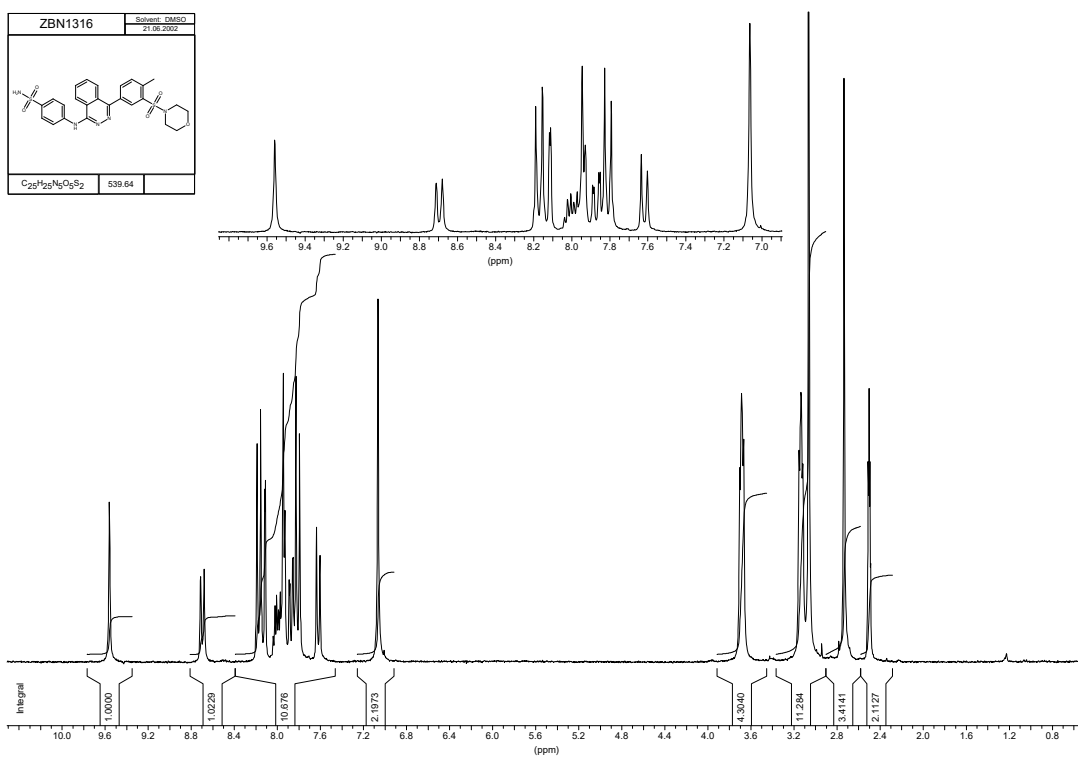

Compd. 6g

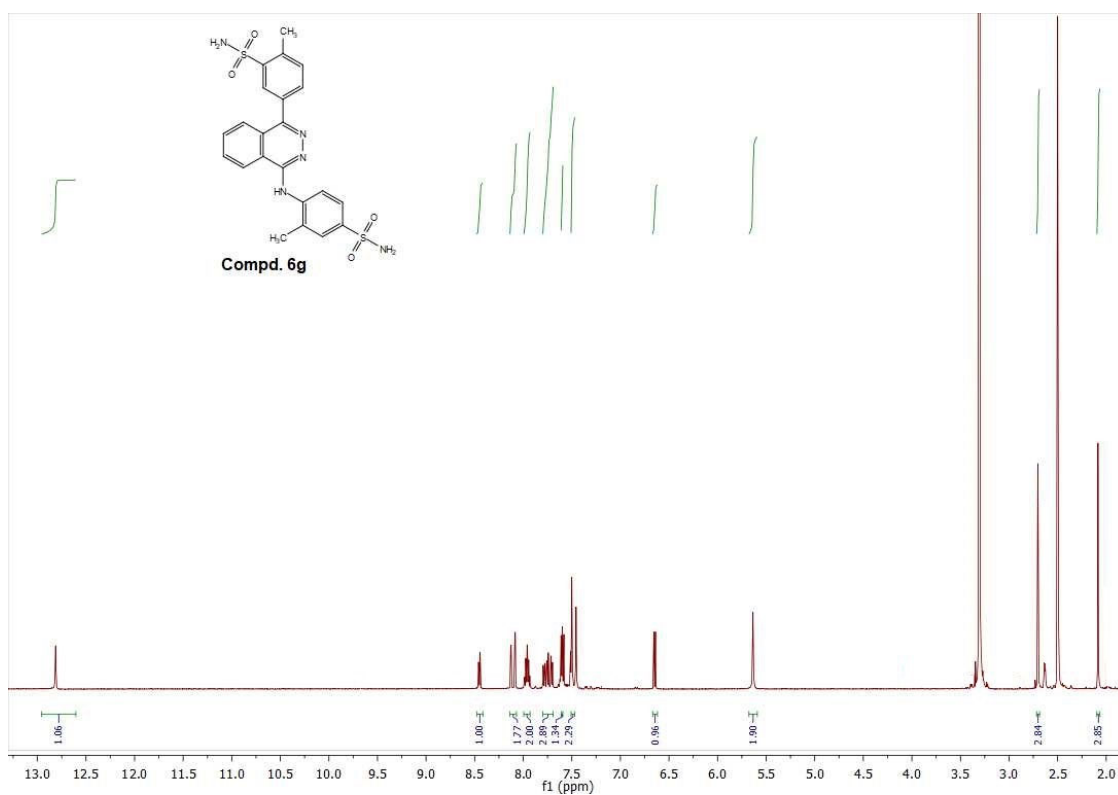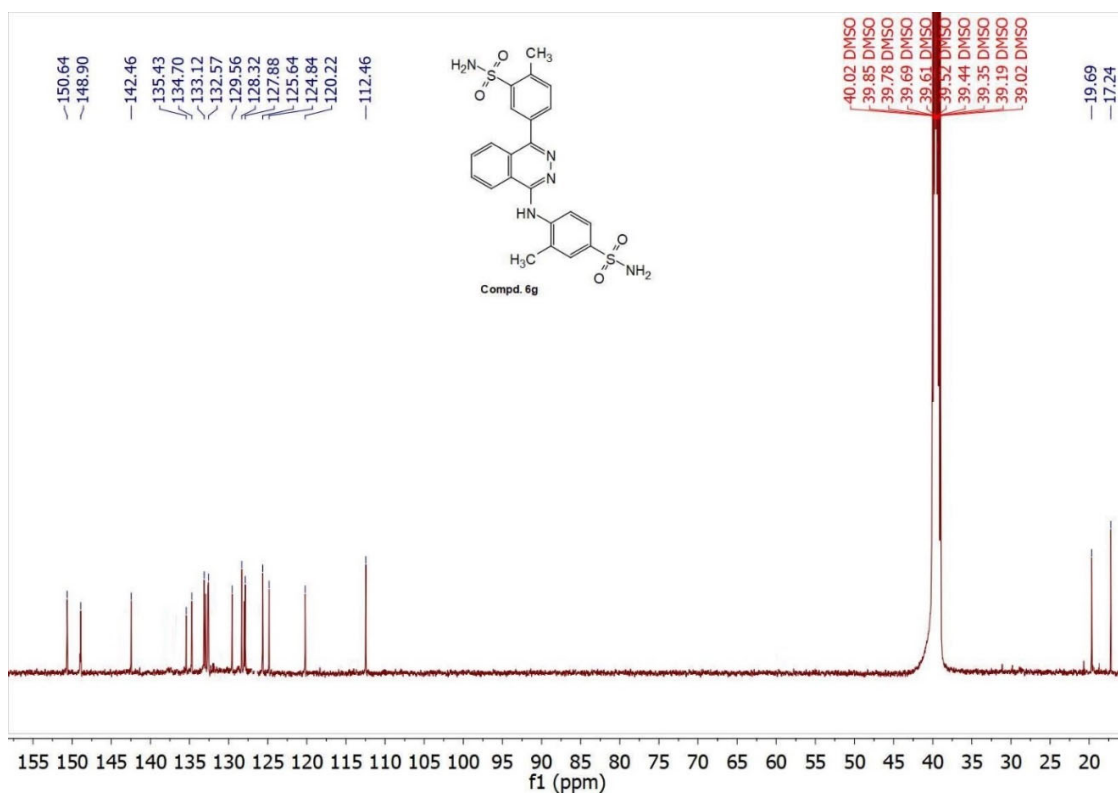

**Compd. 11**

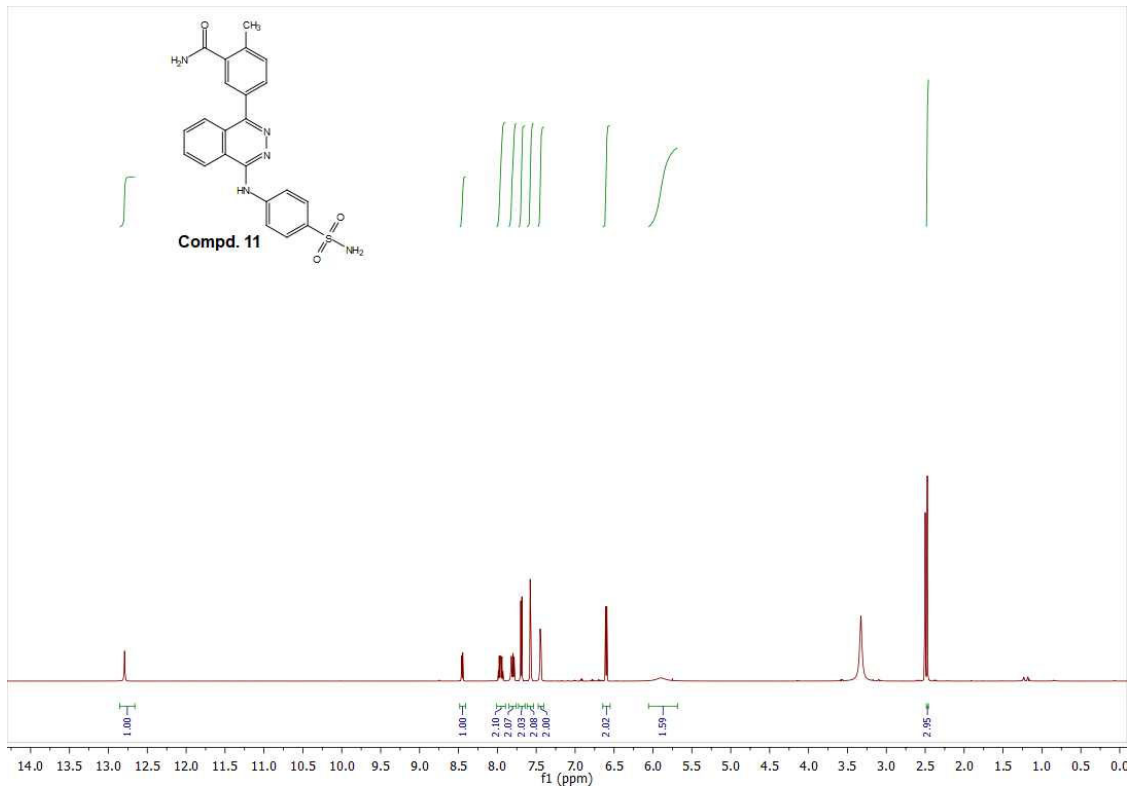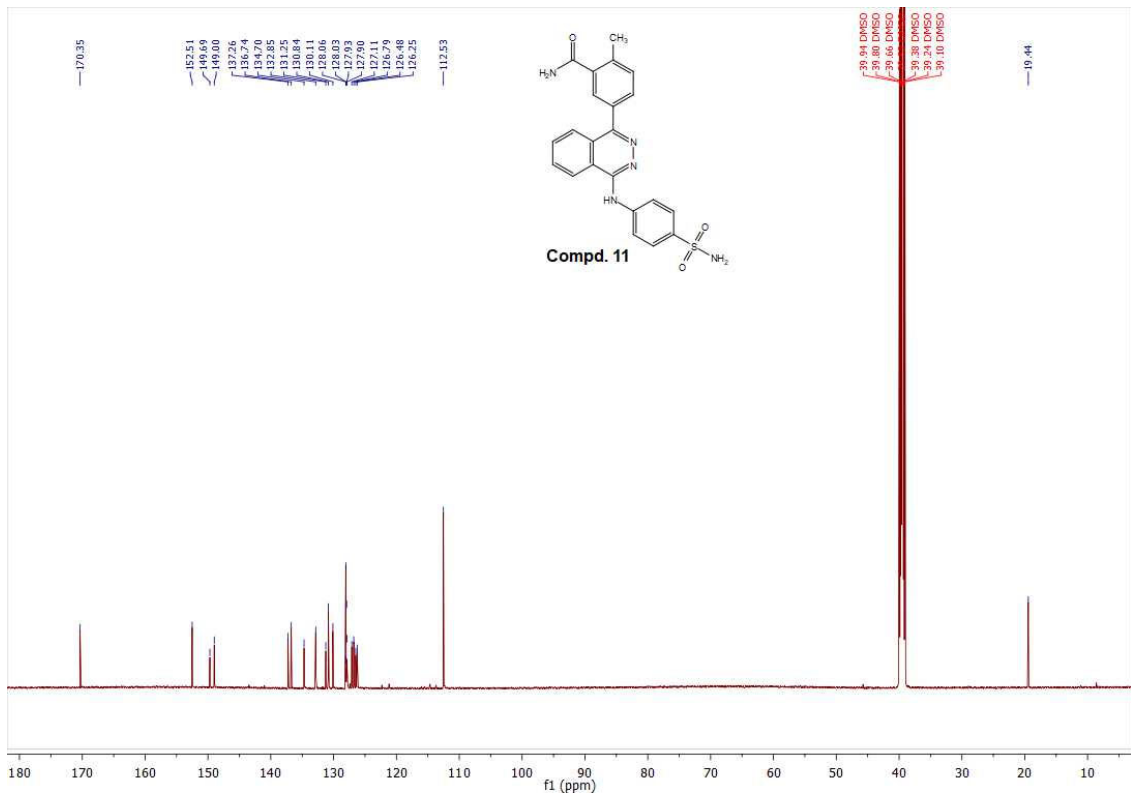

# Compd. 15

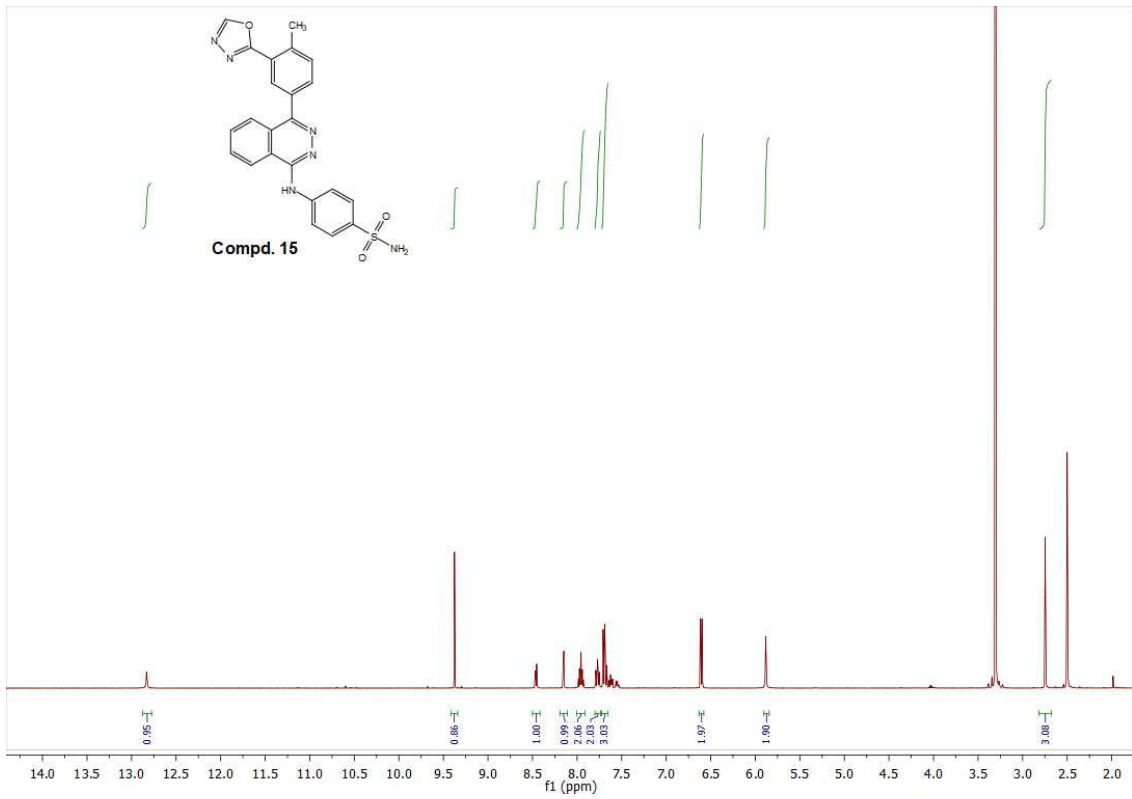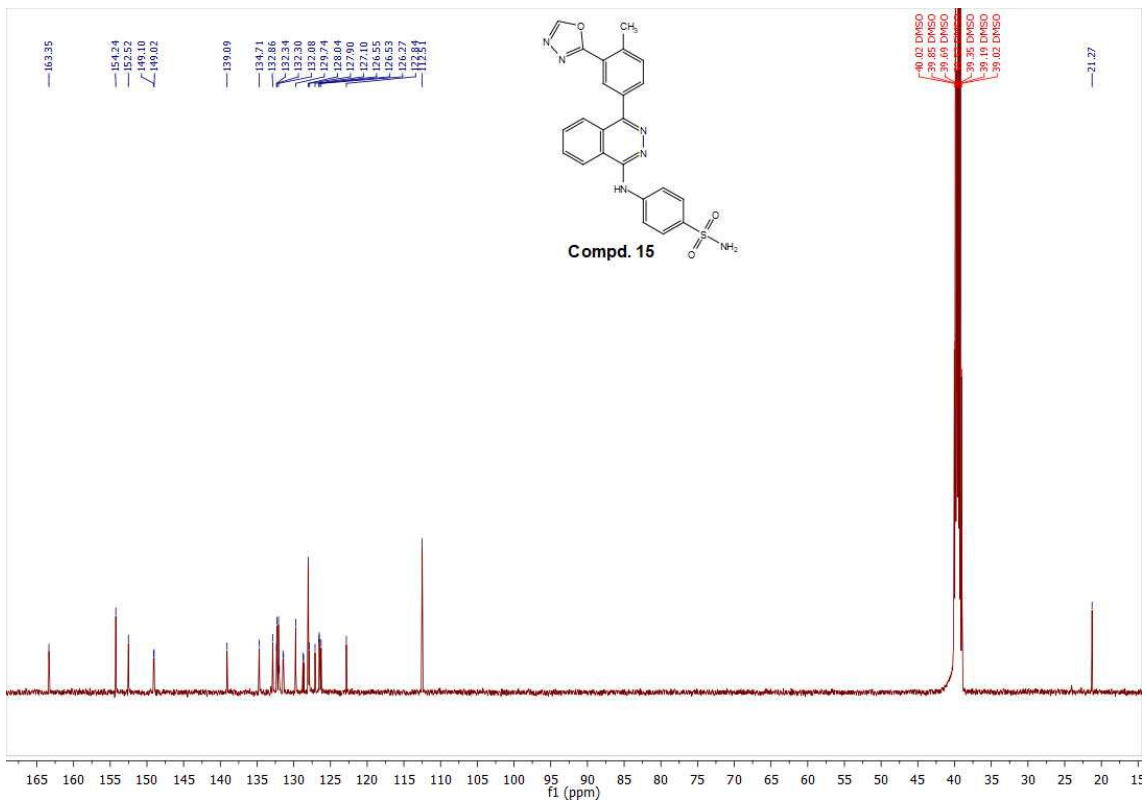



### Compd. 34

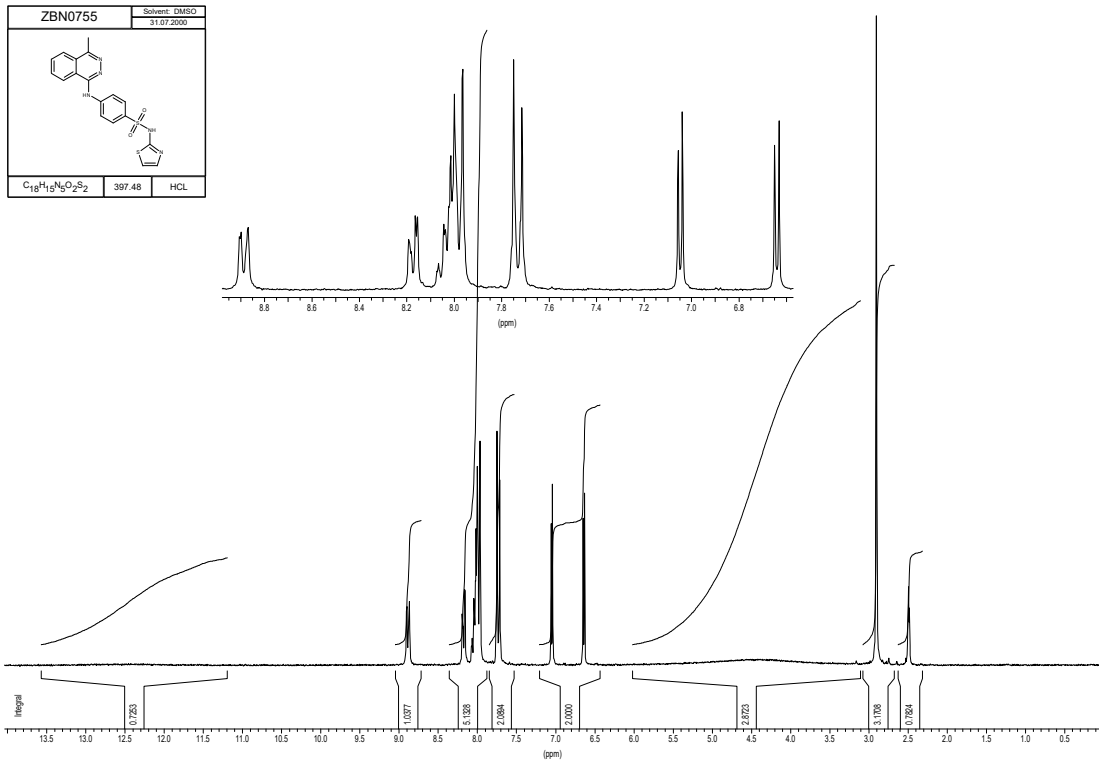

### Compd. 36

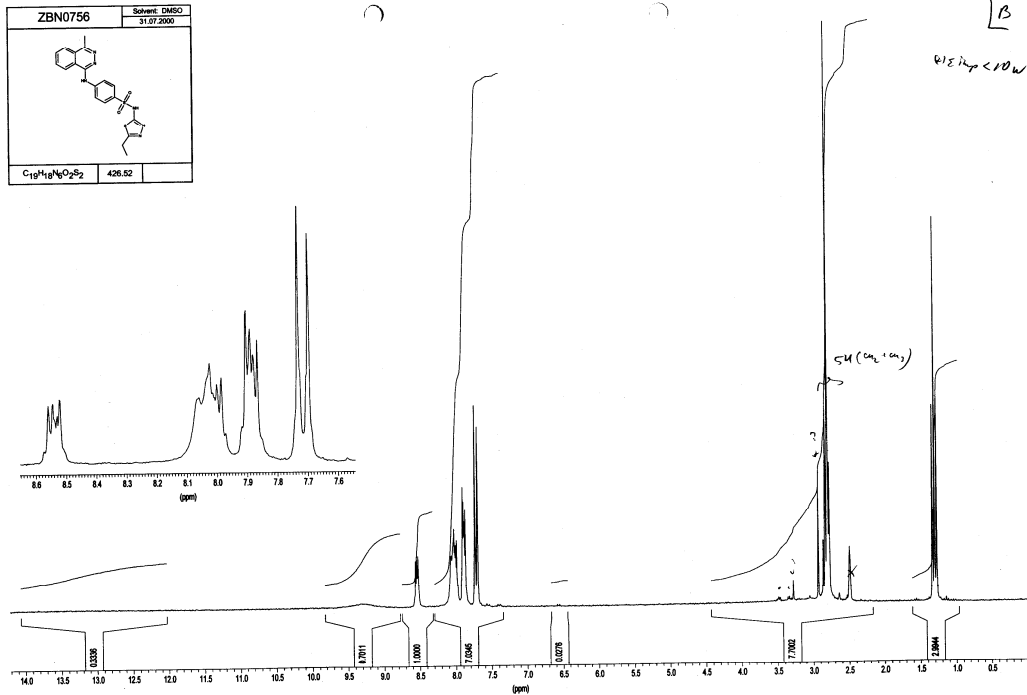

## REFERENCES

- (1) J. Iqbal, S. A. Lévesque, J. Sévigny, C. E. Müller, *Electrophoresis*, 2008, **29**, 3685–3693.
- (2) R. Gao, S. Liao, C. Zhang, W. Zhu, L. Wang, J. Huang, Z. Zhao, H. Li, X. Qian, Y. Xu, *Eur. J. Med. Chem.*, 2013, **62**, 597–604.
